# Supplementary material for: Barriers and facilitators of family doctor contract services in caring for disabled older adults in Beijing, China: a mixed methods study
Source: PubMed Central journal article supplement — BMJ Open. 2023 Jun 1;13(6):e070130. doi: 10.1136/bmjopen-2022-070130 (PMC10255286; doi:10.1136/bmjopen-2022-070130), 2023-06-01
Supplement: bmjopen-2022-070130.draft_revisions.pdf [file bmjopen-2022-070130.draft_revisions.pdf]

# BMJ Open

BMJ Open is committed to open peer review. As part of this commitment we make the peer review history of every article we publish publicly available.

When an article is published we post the peer reviewers' comments and the authors' responses online. We also post the versions of the paper that were used during peer review. These are the versions that the peer review comments apply to.

The versions of the paper that follow are the versions that were submitted during the peer review process. They are not the versions of record or the final published versions. They should not be cited or distributed as the published version of this manuscript.

BMJ Open is an open access journal and the full, final, typeset and author-corrected version of record of the manuscript is available on our site with no access controls, subscription charges or pay-per-view fees (<http://bmjopen.bmj.com>).

If you have any questions on BMJ Open's open peer review process please email [info.bmjopen@bmj.com](mailto:info.bmjopen@bmj.com)

# BMJ Open

## The Barriers and Facilitators of Family Doctor Contract Services in Caring for the Disabled Elderly in Beijing, China: A Mixed Methods Study

|                               |                                                                                                                                                                                                                                                                                                                                                                                                                                                                                                                                                                                                                                                                                                                     |
|-------------------------------|---------------------------------------------------------------------------------------------------------------------------------------------------------------------------------------------------------------------------------------------------------------------------------------------------------------------------------------------------------------------------------------------------------------------------------------------------------------------------------------------------------------------------------------------------------------------------------------------------------------------------------------------------------------------------------------------------------------------|
| Journal:                      | <i>BMJ Open</i>                                                                                                                                                                                                                                                                                                                                                                                                                                                                                                                                                                                                                                                                                                     |
| Manuscript ID                 | bmjopen-2022-070130                                                                                                                                                                                                                                                                                                                                                                                                                                                                                                                                                                                                                                                                                                 |
| Article Type:                 | Original research                                                                                                                                                                                                                                                                                                                                                                                                                                                                                                                                                                                                                                                                                                   |
| Date Submitted by the Author: | 16-Nov-2022                                                                                                                                                                                                                                                                                                                                                                                                                                                                                                                                                                                                                                                                                                         |
| Complete List of Authors:     | Zhang, Zhiying; Capital Medical University, School of Medical Humanities<br>Zhang, Ruyi; Capital Medical University Affiliated Beijing Ditan Hospital, Ethics Committee Office<br>Peng, Yingchun; Capital Medical University, School of Medical Humanities<br>Zhai, Shaoqi; Capital Medical University, School of Medical Humanities<br>Zhang, Jiaying; Capital Medical University, School of Medical Humanities<br>Jin, Qilin; People's Hospital of Beijing Daxing District<br>Zhou, Jiaojiao; Fengtai District Xiluoyuan Community Health Service Center<br>Li, Hanlin; Capital Medical University, School of Basic Medical Science<br>Chen, Jingjing; Huairou District Liulimiao Community Health Service Center |
| Keywords:                     | Quality in health care < HEALTH SERVICES ADMINISTRATION & MANAGEMENT, PUBLIC HEALTH, HEALTH SERVICES ADMINISTRATION & MANAGEMENT, Organisation of health services < HEALTH SERVICES ADMINISTRATION & MANAGEMENT                                                                                                                                                                                                                                                                                                                                                                                                                                                                                                     |
|                               |                                                                                                                                                                                                                                                                                                                                                                                                                                                                                                                                                                                                                                                                                                                     |

SCHOLARONE™  
Manuscripts

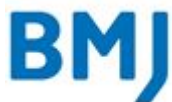

I, the Submitting Author has the right to grant and does grant on behalf of all authors of the Work (as defined in the below author licence), an exclusive licence and/or a non-exclusive licence for contributions from authors who are: i) UK Crown employees; ii) where BMJ has agreed a CC-BY licence shall apply, and/or iii) in accordance with the terms applicable for US Federal Government officers or employees acting as part of their official duties; on a worldwide, perpetual, irrevocable, royalty-free basis to BMJ Publishing Group Ltd ("BMJ") its licensees and where the relevant Journal is co-owned by BMJ to the co-owners of the Journal, to publish the Work in this journal and any other BMJ products and to exploit all rights, as set out in our [licence](#).

The Submitting Author accepts and understands that any supply made under these terms is made by BMJ to the Submitting Author unless you are acting as an employee on behalf of your employer or a postgraduate student of an affiliated institution which is paying any applicable article publishing charge ("APC") for Open Access articles. Where the Submitting Author wishes to make the Work available on an Open Access basis (and intends to pay the relevant APC), the terms of reuse of such Open Access shall be governed by a Creative Commons licence – details of these licences and which [Creative Commons](#) licence will apply to this Work are set out in our licence referred to above.

Other than as permitted in any relevant BMJ Author's Self Archiving Policies, I confirm this Work has not been accepted for publication elsewhere, is not being considered for publication elsewhere and does not duplicate material already published. I confirm all authors consent to publication of this Work and authorise the granting of this licence.

## The Barriers and Facilitators of Family Doctor Contract Services in Caring for the Disabled Elderly in Beijing, China: A Mixed Methods Study

Zhiying Zhang<sup>1#</sup>, Ruyi Zhang<sup>2#</sup>, Yingchun Peng<sup>1\*</sup>, Shaoqi Zhai<sup>1</sup>, Jiaying Zhang<sup>1</sup>, Qilin Jin<sup>3</sup>, Jiaojiao Zhou<sup>4</sup>, Hanlin Li<sup>5</sup>, Jingjing Chen<sup>6</sup>

\*Correspondence: [pycjq@ccmu.edu.cn](mailto:pycjq@ccmu.edu.cn) ORCID ID : 0000-0002-2168-5155

# Zhiying Zhang and Ruyi Zhang contributed equally to this work

<sup>1</sup> School of Medical Humanities, Capital Medical University, No.10, Xitoutiao, You An Men Wai, Beijing 100069, China

<sup>2</sup> Ethics Committee Office, Beijing Ditan Hospital, Capital Medical University, No. 8 Jingshun East Street, Chaoyang District, Beijing 100015, China

<sup>3</sup> Cardiac Surgery Department, People's Hospital of Beijing Daxing District, No.26, Huangcun West Street, Daxing District, Beijing

<sup>4</sup> Fengtai District Xiluoyuan Community Health Service Center, Beijing, China

<sup>5</sup> School of Basic Medical Science, Capital Medical University, No.10, Xitoutiao, You An Men Wai, Beijing 100069, China

<sup>6</sup> Huairou District Liulimiao Community Health Service Center, Beijing, China

### Abstract

**Objective** To evaluate the current state of Family doctor contract services (FDCS) in Beijing, identify the responsibilities of (Family doctors) FDs who have worked with the disabled elderly, and investigate the challenges and opportunities faced by FDCS in providing care for them.

**Design** A cross-sectional mixed methods study was carried out from October 2020 to January 2021. Quantitative data were collected by using the self-designed questionnaire. Qualitative data were gleaned by adopting a semi-structured interview.

**Setting** 15 Community health services centers (CHCs) were selected in four districts of Beijing by using multistage sampling strategy. Among 4 districts, 2 from urban areas, 2 from rural areas.

**Participants** From the 15 sampled CHCs in four districts of Beijing, China, a random sample of 283 family doctors participated in the questionnaire survey. During the same period, 30 FDs at the site from 15 CHCs in Beijing were randomly selected.

**Results** On the one hand, FDs are essential to the FDCS for the disabled elderly. In addition to

1  
2  
3  
4 acting as “gatekeepers” in CHCs, FDs also played another five unique roles, including  
5 “psychological consultant”, “rehabilitation physiotherapist”, “health educator”, “health manager”,  
6 and “family health guardian”. On the other hand, FDs are confronted with a myriad of barriers  
7 (including high risks in the process of home visits, a lack of supervisory and incentive mechanisms,  
8 insufficiency of time and energy, etc) and facilitators (including establishing a doctor-patient trust  
9 relationship, developing humanistic care services, etc) in the FDCS of the disabled elderly.  
10  
11  
12  
13  
14

15 **Conclusions** This study has demonstrated the relationships between barriers and roles of FDs in  
16 FDCS and put forward corresponding suggestions to improve the quality of FDCS. It is suggested  
17 that further research needs to focus on solving existing barriers of FDCS to optimize the health of  
18 the disabled elderly and improve the quality of their lives.  
19  
20  
21  
22

23 **Keywords:** family doctors, the disabled elderly, roles, barriers, facilitators  
24

#### 25 **What is already known on this topic**

- 26 ■ Family doctor contract services has been implemented widely in many countries.
- 27 ■ Family doctors has been shown to be an ideal medical service provider to meet the diverse  
28 needs of the disabled elderly, but little is understood about the specific roles of family doctors,  
29 barriers and facilitators of family doctor contract services in caring for the disabled elderly.  
30  
31  
32  
33  
34

#### 35 **What this study adds**

- 36 ■ Mixed methods were conducted in this study to explore the current status of family doctor  
37 contract services for the disabled elderly, the workload of family doctors, family doctors’  
38 evaluation of contracted services, and barriers and facilitators of family doctor contract services  
39 in caring for the disabled elderly.  
40  
41  
42  
43  
44

#### 45 **How this study might affect research, practice or policy**

- 46 ■ This study identifies six unique roles of family doctors in caring for the disabled elderly and  
47 describes the relationships between barriers and the roles of family doctors, which can enrich  
48 the international discussion of similar topics, and inform national policies and agenda setting  
49 for achieving national and global targets for removing the current FDCS restrictions to improve  
50 the health of the disabled elderly and their well-being.  
51  
52  
53  
54  
55

### 56 **1. Introduction**

57  
58 With the global escalation of the aging process and the extension of average life expectancy, more  
59 and more old people tend to face a high risk of disability. *The World Report on Disability* manifested  
60

1  
2  
3  
4 that there are more than 1000 million people with disabilities in the world, and disability  
5 disproportionately exerts a profound influence on vulnerable populations, in particular, the elderly  
6 [1]. At the end of 2020, there are more than 85 million people living with some type of disability in  
7 China [2]. Among them, the population of disabled elderly has reached 26.28 million, accounting  
8 for 9.95% of the overall elderly [3]. Beijing, as a typical example, is characterized by advanced age  
9 and a high disability rate. In 2021, there are about 205,000 disabled elderly people in Beijing, the  
10 disability rate of the elderly is 4.78% and the disabled elderly with moderate or severe disability  
11 account for 70% of the whole disabled elderly [4]. Not only does the large number of disabled  
12 elderly imposes a heavy burden on society, but the disabled elderly's needs for health and medical  
13 services also bring a great challenge to the primary care system.  
14  
15  
16  
17  
18  
19  
20  
21  
22

23 The disabled elderly, as a priority group of society, have extremely complex conditions and  
24 diversified needs. Nieboer A. et al. found that different elderly groups have different values for long-  
25 term care services [5]. Important factors including the physical, mental, and family financial  
26 conditions of the disabled elderly have a significant influence on the choice of the disabled elderly's  
27 needs [6,7]. A related study indicates that the disabled elderly's care not only need daily care, but  
28 also medical care and rehabilitation training care services [8]. Due to poor physical conditions, many  
29 disabled elderly people have difficulty moving, they hardly can go to the hospital by themselves.  
30 CHC may become the only way for them to obtain medical treatment. Moreover, most elderly with  
31 severe disabilities have lost normal physiological functions, they have to rely on external devices,  
32 such as a gastric tube, and a urinary catheter to support their daily physical needs. However,  
33 changing the gastric tube or urinary catheter is a knotty problem for those bedridden elderly and  
34 their families. Therefore, it is crucial to consider how the primary care system can satisfy the care  
35 needs of the disabled elderly.  
36  
37  
38  
39  
40  
41  
42  
43  
44  
45  
46  
47

48 It has been proven worldwide that a strong primary healthcare system is a foundation and guarantee  
49 of an efficient healthcare system [9,10]. As a core component of the primary healthcare system,  
50 FDCS is a matter of cardinal significance in realizing hierarchical diagnosis treatment, and  
51 optimizing health outcomes and healthcare containment in practice [11]. Family doctors (FDs) as  
52 medical specialists are trained to allocate health resources reasonably and provide comprehensive,  
53 continuous, effective, opportune, and personalized medical care for service objects. FDs are also the  
54 gatekeepers of residents' health, it is therefore that the policy of FDCS has been implemented widely  
55  
56  
57  
58  
59  
60

1  
2  
3  
4 in many countries [12-14].

5 Primary care was given a prominent position in China's new healthcare reform plan in 2009, and  
6 boosting FDCS was an expansion and growth of the primary care system [15]. FDCS is an objective  
7 requirement and an important way to achieve hierarchical diagnosis treatment and improve the level  
8 of primary care in China [16]. By utilizing FDCS, FDs in CHC establish a long-lasting, ongoing,  
9 and stable contractual relationship with the locals. And it is natural to provide medical care, and  
10 essential public health management services for them, including establishing health records,  
11 physical examinations, chronic disease follow-ups, etc. With a growing proportion of aging, FDs'  
12 relevant work is increasingly skewed toward the elderly group, especially the disabled elderly. The  
13 National Health Commission also released a series of policies about FDCS, which requires FDs to  
14 "provide door-to-door medical and health services for disabled and semi-disabled elderly,  
15 terminally ill patients and other people who are in urgent need, and extend the contracted services  
16 from institutions to communities and families[17]."

17  
18  
19  
20  
21  
22  
23  
24  
25  
26  
27  
28  
29  
30  
31  
32  
33  
34  
35  
36  
37  
38  
39  
40  
41  
42  
43  
44  
45  
46  
47  
48  
49  
50  
51  
52  
53  
54  
55  
56  
57  
58  
59  
60  
FDs, as ideal medical service providers, are expected to take a pivotal role in the provision of  
medical care services for the disabled elderly and meet the disabled elderly's diversified needs.  
Previous studies mainly shine the spotlight on the roles of FDs in the primary care system [18,19],  
the effect of FDCS [20,21], and the barriers and challenges of disabled people accessing primary  
care services [22-24]. However, there is less research to figure out whether FDs are qualified to deal  
with complex cases of the disabled elderly, what roles FDs play in the FDCS model with the disabled  
elderly and what barriers and facilitators of FDCS will have in the process of caring for the disabled  
elderly. In order to identify the roles and services of FDs contracted with the disabled elderly and  
explore the barriers and facilitators of FDCS in Beijing, mixed methods research has been conducted.

## 2. Materials and Methods

### 2.1 Study Design

Mixed methods were used in data collection and the analytical process. In the quantitative phase, a  
cross-sectional survey using a self-designed questionnaire was conducted on FDs. The self-designed  
questionnaire made emphasis on three aspects, including the current status of FDCS for the disabled  
elderly, the workload for home visits by FDs, and FDs' evaluation of contracted services for the  
disabled elderly. In the qualitative phase, a one-to-one and semi-structured in-depth personal  
interview for FDs was utilized to supplement and support the study. As thematic framework

1  
2  
3  
4 methods adopted, the content of the interview mainly is to focalize two perspectives, one is the  
5 differences in health management between contracted healthy elderly and the disabled elderly, and  
6 the other is the barriers and facilitators of FDCS in caring for the disabled elderly. The process of  
7 mixed methods is shown in Figure 1 and described in detail below.  
8  
9  
10

## 11 12 13 **2.2 Quantitative Phase**

### 14 15 **2.2.1 Data Collection and Subjects**

16  
17 A cross-sectional quantitative survey was carried out on FDs in the CHCs of Beijing, the capital  
18 city of China, from October 2020 to January 2021. A multistage sampling strategy was adopted. In  
19 the first stage, 4 districts of Beijing (2 from urban areas, namely Xicheng District, Fengtai District;  
20 2 from rural areas, namely Daxing District, and Huairou District) were selected based on the level  
21 of economic development and the linear distance from Tiananmen Square. In the second stage, 3 to  
22 5 CHCs were randomly picked out in each district, amounting to 15 CHCs were in the list. Lastly,  
23 trained investigators were dispatched to each sampling CHCs to randomly invite FDs to participate  
24 in our investigation [25,26].  
25  
26  
27  
28  
29  
30  
31  
32

33 This survey excluded the respondents who had not signed a contract with the disabled elderly or  
34 worked for the disabled elderly for less than 6 months. Face-to-face interviews with FDs.  
35 Participants are required to read the informed consent form and obtain oral consent, then fill out the  
36 questionnaires and took part in this survey [27]. The ethics approval was given by the Medical  
37 Ethics Committee of Capital Medical University.  
38  
39  
40  
41

42 A random sample of 283 family doctors participated in the questionnaire survey in the 15 selected  
43 CHCs, among which 90% are the center's registered doctors. The returned questionnaires with  
44 missing values on the outcome and explanatory variables were to the exclusion of data analysis,  
45 and hence final samples of 276 were gathered.  
46  
47  
48  
49

### 50 51 **2.2.2 Measurements**

52 Under the national and Beijing's relevant policies of FDCS for the disabled elderly, it is therefore  
53 that the research team has considered the humanistic environment, regional characteristics and the  
54 actual situation of the contracted services in Beijing and compiled a self-designed questionnaire  
55 after an extensive review of relevant literature and repeated discussion by panel experts.  
56  
57  
58  
59

#### 60 **2.2.2.1 Current status of FDCS for the disabled elderly**



1  
2  
3  
4 To investigate the current status of FDCS for the disabled elderly, four aspects were tracked: 1) the  
5 type of contract services that FDs provided for the disabled elderly; 2) the top three services that the  
6 disabled elderly needed most from the perspective of FDs; 3) the most concerning factors of the  
7 disabled elderly while FDs providing medical services; 4) the main reasons that affect FDs to  
8 provide services for the disabled elderly.  
9

#### 10 11 12 13 **2.2.2.2 The workload for home visits by FDs**

14  
15 To describe the workload of home visits by FDs, three variables were taken into consideration: 1 )  
16 the frequency per year of home visits provided by each FD for the disabled elderly; 2) the treatment  
17 time in hours quantified the time of treatment for each home visit. 3) the workload for home visits  
18 by FDs was calculated by multiplication of the treatment time with the frequency per year.  
19

#### 20 21 22 23 **2.2.2.3 FDs' evaluation of contracted services for the disabled elderly**

24  
25 FDs' evaluation of contracted services for the disabled elderly mainly focused on three aspects: 1)  
26 cooperation frequency of the disabled elderly and their families when FDs operate home visits  
27 service; 2) importance of FDs' role in the FDCS for the disabled elderly; 3) The extent to which  
28 FDCS meet the medical needs of the disabled elderly.  
29

### 30 31 32 33 **2.2.3 Statistical Methods**

34  
35 Statistical description: Data were recorded into EpiData 3.1 system and processed by SPSS 21.0  
36 statistical software. The mean and standard deviation were used to statistically describe the  
37 measurement data, and the counting data were presented by composition ratio, frequency, and parity  
38 arrangement.  
39

40  
41 Data analysis: Frequency and rank were applied to display the quantitative data of FDs including  
42 demographic characteristics, gender, age, regions, education and positional title, rank sum test was  
43 used to analyze the content of the FDs' evaluation of contracted services for the disabled elderly, in  
44 which Wilcoxon rank sum test pointed to for two groups and Kruskal-Wallis H test (K-W test) for  
45 multiple groups.  
46

## 47 48 49 50 51 **2.3 Qualitative phase**

### 52 53 54 **2.3.1 Sampling and Interviews**

55  
56 As for the qualitative survey, 30 FDs at the site from 15 CHCs in Beijing were randomly selected.  
57  
58 It is worthwhile to mention that FDs who were not contracted with the disabled elderly or engaged  
59  
60

1  
2  
3  
4 in the related work of the disabled elderly for less than 6 months were precluded.

5  
6 The content of the interview contained the demographic characteristics of FDs, the differences of  
7  
8 health management between contracted healthy elderly and the disabled elderly, the barriers and  
9  
10 facilitators of FDCS of the disabled elderly. One-to-one, semi-structured in-depth personal  
11  
12 interviews were conducted in this study. All the interviewers have received a unified standard  
13  
14 training in advance, so as to avoid the induced problems and reduce research bias. Before the  
15  
16 interview, the interviewee introduced the research purpose, methods, content and confidentiality  
17  
18 principles to the interviewees in detail, and obtained informed consent [28]. During the interview,  
19  
20 one investigator was responsible for recording the interviewee's comments, whilst the other was  
21  
22 assigned to ask questions. The comments of respondents were written down and verbatim by the  
23  
24 interviewer. To ensure the accuracy and completeness of the information, and the entire processes  
25  
26 recorded with the consent of the interviewees. The data saturation of our research is defined as the  
27  
28 point when the interviewees did not show any new content or views in the latest round of interviews  
29  
30 [29]. 30 FDs reached the maximum of data saturation. After the interview, the recorded content will  
31  
32 be transcribed in detail within 24 hours by members of the research group to ensure the authenticity  
33  
34 of the interview content. The interviewees were anonymized, and FDs were coded with N1 ~ N30.

### 35 36 **2.3.2 Content Analysis**

37  
38 A thematic framework method was employed in the qualitative study. The data are classified and  
39  
40 analyzed by identifying themes, labeling data, and extracting core information [30]. With the help  
41  
42 of the grounded theory [31,32], the data was divided into discrete parts that represented of raw data  
43  
44 and open-coded in order to dig out as many themes as possible [33]. The dominant themes were  
45  
46 extracted from the comment that appeared repeatedly. Data reduction was performed manually. We  
47  
48 classified the related comments into various categories. In this regard, cooperation and division of  
49  
50 labor coexist. Specifically, two coders initially read the transcripts and edited the data into codes,  
51  
52 and then reread and identified transcripts and coded them into emerging categories [34]. In the next  
53  
54 stage, the codes were later organized into themes and further expanded into broader domains after  
55  
56 adequate discussion. Finally, the theme-based variables were determined by reaching a consensus.

### 57 58 **2.4 Patient and public involvement**

59  
60 No patients or public were involved in the design, or conduct, or reporting, or dissemination plans

of this research.

### 3. Results

#### 3.1 Quantitative findings

The demographic characteristics of 276 FDs are displayed in Table 1. Males occupied less than half (30.1%) of the participants. The proportion of females is about twice that of males. Approximately 47.1% of FDs are between 30 and 40 years, and the average age of 276 FDs is  $38.93 \pm 8.63$  years old. There are 93 (33.7%) FDs from Fengtai District, 69 (25.0%) FDs from Daxing District, 59 (21.4%) FDs from Huairou District, and 55 (19.9%) FDs from Xicheng District. Almost 83.7% of the participants obtained bachelor's or above degree. Only 4 FDs haven't got any positional title, FDs with the positional title of "resident" or "attending physician" comprised 30.8% and 48.9%, respectively.

**Table 1 Demographic characteristics of FDs**

| Items                                     | Number of surveys (%) |
|-------------------------------------------|-----------------------|
| <b>Gender</b>                             |                       |
| Male                                      | 83 (30.1)             |
| Female                                    | 193 (69.9)            |
| <b>Age</b>                                |                       |
| 20~                                       | 47 (17.0)             |
| 30~                                       | 130 (47.1)            |
| 40~                                       | 78 (28.3)             |
| 50~                                       | 15 (5.4)              |
| 60~                                       | 6 (2.2)               |
| <b>Regions</b>                            |                       |
| Xicheng District                          | 55 (19.9)             |
| Fengtai District                          | 93 (33.7)             |
| Daxing District                           | 69 (25.0)             |
| Huairou District                          | 59 (21.4)             |
| <b>Education</b>                          |                       |
| High school or technical secondary school | 4 (1.4)               |

|                              |                    |
|------------------------------|--------------------|
| Junior college               | 41 (14.9)          |
| University                   | 177 (64.1)         |
| Postgraduate degree or above | 54 (19.6)          |
| <b>Positional title</b>      |                    |
| Chief physician              | 4 (1.4)            |
| Associate chief physician    | 48 (17.4)          |
| Attending physician          | 135 (48.9)         |
| Resident                     | 85 (30.8)          |
| None                         | 4 (1.4)            |
| <b>Total</b>                 | <b>276 (100.0)</b> |

Table 2 revealed current status of FDCS for the disabled elderly in Beijing. The contracted services provided for the disabled elderly comprise primary care, home visits, medical examination, health consultation and education, medication guidance, telephone follow-up, psychological counseling and family care. Among these services, primary care is the most common services for the disabled elderly, following by health consultation and education, and medication examination. According to the situation of service needs for the disabled elderly, FDs hold the idea that the medication guidance, medical examination and home visits are the top three services which the disabled elderly desired most. Attitude in the service is the most concerned factors of the disabled elderly. There are many reasons that exert an influence on FDs to offer services for the disabled elderly, for instance, short of hands and intensive work is one of the biggest obstacles for FDs to serve the disabled elderly.

**Table 2 Current status of FDCS for the disabled elderly**

| Items                                                  | Results           |      |
|--------------------------------------------------------|-------------------|------|
| <b>Types of contracted services which FDs provided</b> | Total person-time | Rank |
| Primary care                                           | 254               | 1    |
| Home visits                                            | 176               | 6    |
| Medical examination                                    | 222               | 5    |
| Health consultation and education                      | 239               | 2    |

1  
2  
3  
4  
5  
6  
7  
8  
9  
10  
11  
12  
13  
14  
15  
16  
17  
18  
19  
20  
21  
22  
23  
24  
25  
26  
27  
28  
29  
30  
31  
32  
33  
34  
35  
36  
37  
38  
39  
40  
41  
42  
43  
44  
45  
46  
47  
48  
49  
50  
51  
52  
53  
54  
55  
56  
57  
58  
59  
60

|                                                                 |                           |      |
|-----------------------------------------------------------------|---------------------------|------|
| Medication guidance                                             | 234                       | 3    |
| Telephone follow-up                                             | 233                       | 4    |
| Psychological counseling                                        | 162                       | 7    |
| Family care bed                                                 | 30                        | 8    |
| <b>The most desired services for the disabled elderly</b>       | Total points <sup>a</sup> | Rank |
| Primary care                                                    | 255                       | 5    |
| Home visits                                                     | 284                       | 3    |
| Medical examination                                             | 295                       | 2    |
| Health consultation and education                               | 270                       | 4    |
| Medication guidance                                             | 316                       | 1    |
| Telephone follow-up                                             | 84                        | 6    |
| Psychological counseling                                        | 76                        | 7    |
| Family care bed                                                 | 74                        | 8    |
| <b>The most concerned factors of the disabled elderly while</b> | Total person-time         | Rank |
| <b>FDs providing medical services</b>                           |                           |      |
| Diagnostic level                                                | 224                       | 2    |
| Service attitude                                                | 233                       | 1    |
| Charge standard                                                 | 196                       | 3    |
| Drug effectiveness                                              | 159                       | 4    |
| Others                                                          | 9                         | 5    |
| <b>The main reasons that affect FDs to provide services for</b> | Total points <sup>b</sup> | Rank |
| <b>the disabled elderly</b>                                     |                           |      |
| Poor compliance of the disabled elderly and their families      | 200                       | 3    |
| Lack of government policy support                               | 469                       | 2    |
| Short of hands and intensive work                               | 533                       | 1    |
| Unreasonable content of contracted services                     | 137                       | 5    |
| More complicated and difficult conditions to look after the     | 178                       | 4    |
| disabled elderly                                                |                           |      |
| Additional demands from the disabled elderly and their          | 75                        | 6    |

families beyond contracted services

|        |   |   |
|--------|---|---|
| Others | 1 | 7 |
|--------|---|---|

Note: total points <sup>a</sup>=number of people selected for the first desired service×3+ number of people selected for the second desired service×2+ number of people selected for the third desired services×1

Total points <sup>b</sup>=number of people selected for the first main reason×3+ number of people selected for the second main reason×2+ number of people selected for the third main reason×1

Home visits is one of the most desired services for the disabled elderly, which is a bridge of effective communication between FDs and the disabled elderly. Due to the poor physical condition and immobility of the disabled elderly, home visits also are the main service content of FDs' work for the disabled elderly. Therefore, it is necessary to measure and reflect the workload for home visits by FDs when performing contracted services for the disabled elderly. As shown in Table 3, approximately 27.2% of FDs provided home visits services for the disabled elderly once a year. 68 (24.6%) FDs serve the disabled elderly at their home once a month. The frequency of home visits provided by FDs from Fengtai District is the highest, nearly 5.4 times/year. The frequency of home visits in the Huairou district is the lowest, around 2.5 times a year. The treatment time of 139 (50.4%) FDs is from 0.5h to 1h. The average treatment time for each home visits of 276 FDs is nearly 1.03 hours. The average treatment time of home visits, during which FDs from Huairou District spend the most, is around 1.11h. The total yearly workload for home visits provided by FDs is around 4.33 h. The yearly workload of home visits from Fengtai District is the highest and Huairou District is the lowest, almost 5.72h and 2.78h, respectively.

**Table 3 The workload for home visits by FDs**

| Items                           | Regions          |                  |                 |                  | Total     |
|---------------------------------|------------------|------------------|-----------------|------------------|-----------|
|                                 | Xicheng District | Fengtai District | Daxing District | Huairou District |           |
| <b>Frequency per year N (%)</b> |                  |                  |                 |                  |           |
| Once a month                    | 11 (20.0)        | 34 (36.6)        | 17 (24.6)       | 6 (10.2)         | 68 (24.6) |
| Once per quarter                | 10 (18.2)        | 19 (20.4)        | 15 (21.7)       | 9 (15.3)         | 53 (19.3) |
| Once half a year                | 6 (10.9)         | 4 (4.3)          | 10 (14.5)       | 6 (10.2)         | 26 (9.4)  |
| Once a year                     | 16 (29.1)        | 9 (9.7)          | 21 (30.4)       | 29 (49.2)        | 75 (27.2) |

|                     |          |           |          |          |           |
|---------------------|----------|-----------|----------|----------|-----------|
| None                | 7 (12.7) | 10 (10.8) | 2 (2.9)  | 3 (5.1)  | 22 (8.0)  |
| Others <sup>c</sup> | 5 (9.1)  | 17 (18.3) | 4 (5.8)  | 6 (10.2) | 32 (11.6) |
| Total               | 55 (100) | 93 (100)  | 69 (100) | 59 (100) | 276 (100) |
| Mean                | 3.6      | 5.4       | 4.4      | 2.5      | 4.2       |

(time/year)

**Treatment time in Hours N (%)**

|          |           |           |           |           |            |
|----------|-----------|-----------|-----------|-----------|------------|
| 0~       | 11 (20.0) | 16 (17.2) | 7 (10.1)  | 10 (16.9) | 44 (15.9)  |
| 0.5~     | 32 (58.2) | 42 (45.2) | 37 (53.6) | 28 (47.5) | 139 (50.4) |
| 1.0~     | 1 (1.8)   | 27 (29.0) | 21 (30.4) | 13 (22.0) | 71 (25.7)  |
| 2.0~     | 10 (18.2) | 5 (5.4)   | 3 (4.3)   | 5 (8.5)   | 14 (5.1)   |
| 3.0~     | 1 (1.8)   | 3 (3.2)   | 1 (1.4)   | 3 (5.1)   | 8 (2.9)    |
| Total    | 55 (100)  | 93 (100)  | 69 (100)  | 59 (100)  | 276 (100)  |
| Mean (h) | 1.03      | 1.06      | 1.04      | 1.11      | 1.03       |

**Yearly workload Hours (h)**

|       |      |      |      |      |      |
|-------|------|------|------|------|------|
| Total | 3.71 | 5.72 | 4.58 | 2.78 | 4.33 |
|-------|------|------|------|------|------|

Note: In accordance with the disabled elderly's personalized service needs, sometimes the frequency of home visits by FDs is uncertain, we generalize such case into the "others" category. When calculating the FD's workload, such section of the data was not included.

Generally speaking, FDs, the disabled elderly and their families have a good cooperation, 133 (48.2%) FDs indicate that the disabled elderly and their families often cooperate with them while enjoying FDCS, as displayed in Table 4. Approximately 89.8% of FDs think that the contracted services for the disabled elderly take into effect, they believe that they have played an important role in the FDCS for the disabled elderly. Compared with the other 3 districts, FDs from Fengtai district have the highest level of evaluation about contracted services, 83 (89.3%) FDs regard themselves as a vital promoter in providing contracted services for the disabled elderly. 172 (62.2%) FDs acknowledge that the contracted service they provided can meet the medical needs of the disabled elderly, but it is not very high the extent to FDCS required to meet the medical needs of the disabled elderly. Only 40 (14.4%) FDs think that service satisfaction of the disabled elderly has achieved the degree of "more satisfactory" or "most satisfactory".

There is a significant difference among the four districts in the aspects of the importance of FDs'

role and the extent to which FDCS meets the medical needs of the disabled elderly. Cooperation frequency of the disabled elderly and their families among four districts show no significant difference.

Through difference analysis between urban and rural areas, there is no significant difference in the cooperation frequency of the disabled elderly and their families. The importance of FDs' role between urban and rural areas indicates a significant difference. To be more specific, FDs from urban areas believe they play a more important role in FDCS for the disabled elderly than FDs from rural areas. By analyzing the extent to which FDCS meets the medical needs of the disabled elderly, there is a significant difference between urban and rural areas. Rural FDs hold the belief that their services are better than urban FDs to meet the medical needs of the disabled elderly.

**Table 4 FDs' evaluation of contracted services for the disabled elderly**

| Items                                                                         | Regions          |                  |                 |                 | Total      |
|-------------------------------------------------------------------------------|------------------|------------------|-----------------|-----------------|------------|
|                                                                               | Xicheng District | Fengtai District | Daxing District | Huirou District |            |
| <b>Cooperation frequency of the disabled elderly and their families N (%)</b> |                  |                  |                 |                 |            |
| Always                                                                        | 15<br>(27.2)     | 23 (24.7)        | 25 (36.2)       | 8 (13.6)        | 71 (25.7)  |
| Usually                                                                       | 8<br>(14.5)      | 15 (16.1)        | 5 (7.2)         | 10 (16.9)       | 38 (13.8)  |
| Often                                                                         | 24<br>(43.6)     | 43 (46.2)        | 33 (47.8)       | 33 (55.9)       | 133 (48.2) |
| Seldom                                                                        | 4<br>(7.2)       | 10 (10.8)        | 6 (8.7)         | 7 (11.9)        | 27 (9.8)   |
| Never                                                                         | 4<br>(7.2)       | 2 (2.2)          | 0 (0)           | 1 (1.7)         | 7 (2.5)    |
| Total                                                                         | 55<br>(100)      | 93 (100)         | 69 (100)        | 59 (100)        | 276 (100)  |

Difference analysis

between urban and

$\chi^2=0.003$ ,  $P=0.955$



rural areas

Difference analysis

among four  $\chi^2=4.394$ ,  $P=0.222$

districts

**Importance of FDs' role N (%)**

|                 |           |           |           |           |            |
|-----------------|-----------|-----------|-----------|-----------|------------|
| Least important | 5 (9.1)   | 4 (4.3)   | 1 (1.4)   | 3 (5.1)   | 10 (3.5)   |
| Less important  | 4 (7.3)   | 6 (6.5)   | 2 (2.9)   | 22 (37.3) | 18 (6.5)   |
| Important       | 12 (21.8) | 31 (33.3) | 24 (34.8) | 28 (47.5) | 95 (34.4)  |
| More important  | 25 (45.5) | 42 (45.2) | 28 (40.6) | 6 (10.2)  | 117 (42.4) |
| Most important  | 9 (16.4)  | 10 (10.8) | 1 (1.4)   | 0 (0)     | 36 (13.0)  |
| Total           | 55 (100)  | 93 (100)  | 69 (100)  | 59 (100)  | 276 (100)  |

Difference analysis

between urban and  $\chi^2=21.220$ ,  $P<0.001$

rural areas

Difference analysis

among four  $\chi^2=45.938$ ,  $P<0.001$

districts

**The extent to which FDCS meet the medical needs of the disabled elderly N (%)**

|                    |           |           |           |           |            |
|--------------------|-----------|-----------|-----------|-----------|------------|
| Least satisfactory | 12 (21.8) | 7 (7.5)   | 5 (7.2)   | 6 (10.2)  | 30 (10.9)  |
| Less satisfactory  | 12 (21.8) | 32 (34.4) | 11 (15.9) | 19 (32.2) | 74 (26.8)  |
| Satisfactory       | 23 (41.8) | 46 (49.5) | 34 (49.3) | 29 (49.2) | 132 (47.8) |
| More satisfactory  | 8 (14.6)  | 7 (7.5)   | 16 (3.2)  | 5 (8.5)   | 36 (13.0)  |
| Most satisfactory  | 0 (0)     | 1 (1.1)   | 3 (4.3)   | 0 (0)     | 4 (1.4)    |
| Total              | 55 (100)  | 93 (100)  | 69 (100)  | 59 (100)  | 276 (100)  |

Difference analysis

between urban and  $\chi^2=4.996$ ,  $P=0.025$

rural areas

Difference analysis

among four  $\chi^2=13.495$ ,  $P=0.004$

districts

### 3.2 Qualitative findings

8 (26.3%) male and 22 (73.3%) female FDs participate in the interview and provide demographic characteristics information displayed in Table 5. 17 (56.7%) FDs are aged between 30 and 40 years, with an average age of 30 FDs is  $38.33 \pm 6.00$  years old for the first 30 FDs. There are 9 (30.0%) FDs from Xicheng District, which accounts for the largest number of FDs. Most of the interviewees (93.3%) had a bachelor's degree or higher.

**Table 5 Demographic characteristics of FDs**

| Items            | Number of interviewees (%) |
|------------------|----------------------------|
| <b>Gender</b>    |                            |
| Male             | 8 (26.3)                   |
| Female           | 22 (73.7)                  |
| <b>Age</b>       |                            |
| 20~              | 1 (3.3)                    |
| 30~              | 17 (56.7)                  |
| 40~              | 11 (36.7)                  |
| 50~              | 1 (3.3)                    |
| <b>Regions</b>   |                            |
| Xicheng District | 9 (30.0)                   |
| Fengtai District | 8 (26.7)                   |
| Daxing District  | 8 (26.7)                   |
| Huairou District | 5 (16.6)                   |
| <b>Education</b> |                            |
| Junior college   | 2 (6.7)                    |

|                              |                   |
|------------------------------|-------------------|
| University                   | 22 (73.3)         |
| Postgraduate degree or above | 6 (20.0)          |
| <b>Total</b>                 | <b>30 (100.0)</b> |

---

The information from this interview can be distilled into three themes utilizing the thematic framework methodologies as follows:

- (i) The differences in health management between contracted healthy old and the disabled elderly;
- (ii) The facilitators of FDCS in caring for the disabled elderly.
- (iii) The barriers of FDCS in caring for the disabled elderly.

After identifying the meaning units from themes, this study has coded associated sub-themes related to three themes, the analysis process of FDs from the interviews as displayed in Supplementary Table 1.

As shown in Supplementary Table 1, there are many differences of health management between contracted healthy elderly and the disabled elderly. The service content of FDCS should be tailored to the specific needs of the impaired elderly because they have greater health demands than contracted with healthy old. In addition, because of the complicated physical conditions of the elderly with disabilities, providing FDCS is significantly riskier and requires more medical and human resources on the part of FDs. Additionally, FDs should pay closer attention to their physical and mental health and give them more humanistic care, because the majority of elderly people with disabilities have little interaction with other people.

In the process of providing contracted services for the disabled elderly, FDs are confronted with many facilitators and barriers. On the one hand, through FDCS, FDs regularly interact with the disabled elderly and their families, improve their health knowledge, directly provide them with some counsel on nutrition and medication use, which can build trust between the doctor and patient. Meanwhile, FDCS has significantly reduced the strain on neighborhood hospitals and eased the financial burden on older people with disabilities and their families. On the other hand, there are many barriers hindering the development of FDCS. The majority of FDs have acknowledged that labor scarcity is a problem. They often work intensively and sometimes even sacrifice their rest time to provide services for the disabled elderly. However, because there are no supervision or incentive

1  
2  
3  
4 programs in place for FDs, their losses and gains are not directly proportional. Besides, some  
5  
6 problems always haunt FDs, such as high risks in the process of home visits, lack of continuity in  
7  
8 FDCS, poor compliance of the disabled elderly and their families, and insufficient publicity of  
9  
10 FDCS, etc.

#### 11 **4. Discussion**

12  
13 The development of primary care is inseparable from the escort of FDs. At present, over 50 countries  
14  
15 and regions have implemented FDCS and FDs play a more and more vital role in the primary care  
16  
17 system [35]. Due to different medical and health systems of different countries, FDCS has obvious  
18  
19 differences with many countries in service mode [36,37], service content [38-40] and motivation  
20  
21 mechanism [41,42]. By comparing with existing literature, our research finds that the successful  
22  
23 implementation of FDCS in various countries has the following commonalities: 1) The development  
24  
25 of FDCS is based on community health institutions or platforms, such as Patient-centered Medical  
26  
27 Home (PCMH) in US[43,44], the family doctor-and-nurse offices in Cuba[45,46], and FD's  
28  
29 community private clinic in UK, Germany, Netherlands, French and Canada[47-51]. Although the  
30  
31 service model and service content of FDCS are different from the above countries, their health  
32  
33 institutions are all over the country, forming the backbone of primary health care. 2) As the  
34  
35 gatekeeper of residents' health, FDs play six functions in the primary care system, including triage  
36  
37 and treatment, resource allocation, surveillance and monitoring, preventive care, integrated care,  
38  
39 and continuity of care [52-54]. 3) A reasonable and effective incentive mechanism of FDs is a  
40  
41 necessary guarantee for FDs to insist on FDCS, which is closely related to the government's policy  
42  
43 support and the allocation of medical resources[55].

44  
45 Our survey results show that community health centers are the main health institutions that FDCS  
46  
47 rely on, while outreach services play an important role in caring for the disabled elderly. In addition  
48  
49 to offering basic medical services, FDs often provide physical examination, health promotion,  
50  
51 medication guidance, telephone follow-up, home visits and family care bed for the disabled elderly.  
52  
53 From the view of FDs, medication guidance, physical examination and home visits are the top three  
54  
55 services that the disabled elderly desire most. Relevant research evidence shows that with the  
56  
57 increasing demand of medical care and the tightening of government public expenditure, the unmet  
58  
59 needs among the disabled elderly are also increasing[56,57]. Similar to our results,  
60  
FDCS 'satisfaction with the medical needs of the disabled elderly is not high.,Only 40 (14.4%) FDs

1  
2  
3  
4 think that service satisfaction of the disabled elderly has achieved the degree of “more satisfactory”  
5 or “most satisfactory”. It is worth mentioning that there is a significant difference in satisfaction  
6 among the four regions of FDCS. The service provided by rural medical staff for the disabled elderly  
7 is better than that provided by urban medical staff, thus satisfying the medical needs of the disabled  
8 elderly. It means the living standard of the disabled elderly in urban areas is high, compared with  
9 the disabled elderly in rural areas, they may have more diverse medical service needs, so FDCS is  
10 difficult to meet their medical needs. Through measuring the workload for home visits by FDs, this  
11 study effectively assesses the workload of FDs when performing contracted services for the disabled  
12 elderly. Our findings have indicated that the closer the disabled elderly live to the urban area, the  
13 more frequently FDs provide home visits, and the closer to the remote areas, the more time and  
14 effort it takes FDs to make visits. It shows that the current medical resources in Beijing are obviously  
15 unbalanced at present, especially between urban and rural areas..

16  
17  
18  
19  
20  
21  
22  
23  
24  
25  
26  
27  
28  
29  
30  
31  
32  
33  
34  
35  
36  
37  
38  
39  
40  
41  
42  
43  
44  
45  
46  
47  
48  
49  
50  
51  
52  
53  
54  
55  
56  
57  
58  
59  
60

Meanwhile, this study also discusses differences of in health management between contracted with healthy elderly and the disabled elderly. The results show that the disabled elderly have higher health demands and FDs should invest more time and energy to look after them. Besides fulfilling the six functions of gatekeeper in the primary care system, FDs have five unique roles to look after the disabled elderly. 1) “Psychological consultant”, which refers to contacting with the disabled elderly and their families to better understand their physical and psychological conditions and to provide more empathetic treatment. 2) “Rehabilitation physiotherapist”, which means providing rehabilitation treatment to meet the rehabilitative needs of the disabled elderly. 3) “Health Educator”, which entails educating the elderly with disabilities and their families about health issues as well as offering medical advice and health counseling to the elderly with disabilities. 4) “Health Manager”, requires to educate the elderly with disabilities and their families about health issues as well as offer medical advice and health counseling to the elderly with disabilities. 5) “Family health guardian”, which means offering home visits and family care bed services, supporting the family care of the disabled elderly, and protecting the health of the disabled elderly in all aspects. According to the results, 248 (89.8%) FDs regard themselves as an important role in providing contracted services for the disabled elderly, and FDs from urban areas consider they play a more important role in FDCS for the disabled elderly than FDs from those rural areas.

Our research has demonstrated that FDs are confronted with a myriad of barriers and facilitators in

1  
2  
3  
4 the FDCS of the disabled elderly. Following the implementation of FDCS, the facilitators include  
5  
6 developing a trusting connection between the doctor and the patient, enhancing the health literacy  
7  
8 of the elderly with disabilities, reducing the financial burden on the elderly with disabilities and  
9  
10 their families, etc. However, many barriers have occurred on FDs when they provide contract  
11  
12 services for the disabled elderly. In their interviews, the majority of FDs described how difficult it  
13  
14 was to deal with issues such a lack of personnel, the dangers associated with house visits, the  
15  
16 discontinuity of the FDCS, and inadequate promotion of the FDCS, among others. Our study has  
17  
18 classified these barriers into two categories, the exterior barriers and interior ones. The outer barriers  
19  
20 mainly focus on three aspects: 1) High risks involved in home visits. Home visits entail FD leaving  
21  
22 their usual practice space and going to the homes of the disabled elderly. Many FDs expressed  
23  
24 concern that accidents might happen while going to their home or while giving them with medical  
25  
26 care. In China, there is currently no insurance covering medical mishaps involving house visits;  
27  
28 should this occur, FDs would suffer significant financial losses and legal issues. 2) Absence of  
29  
30 supervisory and incentive mechanism. In some developed countries, such as the U.S., Canada,  
31  
32 French[58-60], FDs' personal income is directly related to their own performance due to fair market  
33  
34 competition and free FDs signing model. However, most FDCS in Beijing follow the Pay-for-  
35  
36 Service model, which means the government sets the content and fees of FDCS, and FDs only can  
37  
38 provide these fixed services for the disabled elderly. It is inevitable that the disabled elderly will  
39  
40 generate additional service needs, and FDs will complain about the incentive mechanism. FDs in  
41  
42 the interviews expressed that their efforts were not directly proportional to their income, and most  
43  
44 of the services were driven by their responsibilities. 3) Lack of government policy support and  
45  
46 medical resources input. Shortage of personnel is a major problem which faced by FDs. It reflects  
47  
48 that the current supply of medical human resources are disconnected from the actual medical needs  
49  
50 of the disabled elderly. Moreover, there are obvious differences between urban and rural areas in  
51  
52 terms of medical resource input. FDs in rural areas said that their CHC lacks basic inspection  
53  
54 facilities, which brings a lot of inconveniences to conducting FD contract services

54 The interior barriers are mainly about three aspects: 1) Lack of time and effort. FDs must expend  
55  
56 more effort and time serving the disabled elderly towing to their complex conditions and varied  
57  
58 medical service needs. Many FDs mentioned that they needed to sacrifice their personal time to help  
59  
60 the disabled elderly, which brought a serious pressure on their bodies and minds. 2) Lack of capacity.

1  
2  
3  
4 According to our results, only 40 (14.4%) FDs think that the disabled elderly have been very  
5 satisfied with their services. Additionally, 8 FDs stated in the interviews that they were unable to  
6 handle the issue when the disabled elderly and their families demanded extra services that were  
7 outside the purview of FDCS, which resulted in low compliance from the elderly with disabilities  
8 and their families. 3) Undertaking extra non-professional responsibilities. Most family members of  
9 the disabled elderly think that since signing up with FDs, FDs should take more responsibility for  
10 the disabled elderly. Sometimes FDs feel like they are being filial to the disabled elderly. The  
11 phenomenon of shifting care responsibilities will exacerbate the bad relationship between doctors  
12 and patients.

13  
14 At present, there are few studies on the relationship between the barriers and the roles of functional  
15 medical services in the FDCS disabled elderly people. Based on our findings, the researchers drew  
16 a schematic diagram to describe the relationships between barriers and the roles of FD, as shown in  
17 Figure 2.

18  
19  
20  
21  
22  
23  
24  
25  
26  
27  
28  
29  
30  
31 How to improve the quality of FDCS for the disabled elderly? First, the government should  
32 improve policy formulation, support of FDCS, and establish an effective supervision and incentive  
33 mechanism to ensure that the efforts of FDs is directly proportional to their income. Meanwhile, the  
34 government should strengthen the training and education of FSs to solve the lack of hands, and  
35 improve the laws and regulations on the risk of FDs to ensure their security during home visits.  
36 Besides, the government should promote the policy publicity of FDCS to raise the social status of  
37 FDs, and to reduce misunderstanding about FDs. Second, as far as FDs are concerned, some  
38 standards they must be observed in the process of FDCS. FDs should consciously fulfill the spirit  
39 of the contract, improve the frequency of communication between doctors and patients, pay more  
40 attention to their physical and psychological conditions, and establish a mutual trust relationship  
41 with the disabled elderly and their families. Meanwhile, FDs should refuse the exorbitant demands  
42 of the disabled elderly and resist financial or other temptations to agree to their requests which go  
43 beyond the scope of contracted services. Third, the disabled elderly and their families should  
44 understand and cooperate with FDs [61]. Families of the disabled elderly should assume  
45 responsibility for them, devote more time and effort to caring for them, and take the initiative to  
46 inform FDs of the disabled elderly's most recent physical and mental conditions. By doing this, FDs  
47  
48  
49  
50  
51  
52  
53  
54  
55  
56  
57  
58  
59  
60

1  
2  
3  
4 will be better able to identify the disabled elderly's health risks and lessen the chance of secondary  
5  
6 injury.

## 7 8 5. Strengths and Limitations

9  
10 Our study has investigated the current status of FDCS of the disabled elderly, identified five distinct  
11  
12 roles of FDs who have contracted with the disabled elderly, and explored the relationships between  
13  
14 the barriers and roles of FDs in the process of FDCS. Firstly, from the new perspective of family  
15  
16 doctors, this study has examined many aspects of the current family doctor contract service of the  
17  
18 disabled elderly in Beijing, such as service content, the workload of family doctors, and service  
19  
20 satisfaction, and enriched the international discussion of similar topics. Secondly, this study has  
21  
22 discovered the interests and demands of family doctors as well as potential obstacles and enablers  
23  
24 in the implementation of family doctor contract services for the disabled elderly. Finally, it is the  
25  
26 first time to identify the roles of family doctors in family doctor contract service of the disabled  
27  
28 elderly in Beijing, and manifest the relationships between the roles of family doctors and the barriers.  
29  
30 However, our research inevitably has some shortcomings, which can be roughly divided into two  
31  
32 aspects. First, our qualitative and quantitative findings are dependent on a single subject——FDs,  
33  
34 while FDCS of the disabled elderly involves not only FDs, but also other subjects, such as the  
35  
36 disabled elderly and their families. Second, the representativeness of our study was limited since  
37  
38 only a sample of FDs in 4 districts chosen from 16 in Beijing were interviewed and studied. But we  
39  
40 believe it is worth considering conducting similar studies in smaller cities across the China in the  
41  
42 future and putting more related subjects into our research.

## 43 44 6. Conclusion

45  
46 There is no doubt that FDs play an important role in the FDCS of the disabled elderly. Compared  
47  
48 with contracted healthy elderly, the disabled elderly need more accessible, comprehensive and  
49  
50 humanistic care. Therefore, FDs should devote more time and effort to caring for them. This study  
51  
52 has demonstrated the relationships between barriers, roles played by FDs, and the process of FDCS  
53  
54 and put forward corresponding suggestions to improve the quality of FDCS. Future research must  
55  
56 concentrate on removing the current FDCS restrictions to improve the health of the disabled elderly  
57  
58 and their well-being.  
59  
60



### Acknowledgements

The author would like to thank all the participants, experts and researchers who participated in this study.

### Authors' Contributions

ZZ, ZR, and PY contributed to the conception and design of the research. ZZ, ZR, ZS, ZJ and PY conducted on-site research and data gathering. JQ, ZJ, LH and CJ analyzed the data. ZZ, ZR, ZS and PY drafted the manuscript; and other authors revised it. All authors read and approved the final manuscript. All authors agreed to be accountable for all aspects of the work.

### Funding

This study was funded by Beijing Social Science Foundation Project (Funding Number 19JDSRB008). The funding organization had no further role in the study design, data collection and analysis, interpretation of the data, writing the paper and the decision to submit the paper for publication.

### Ethics Declarations

All included participants gave their oral and written informed consent and all experiments were performed in accordance with relevant guidelines and regulations. The study was approved by Medical Ethics Committee of Capital Medical University, Beijing, China. (Reference number Z2021SY027).

### Competing Interests

The authors declare that they have no competing interest.

1  
2  
3  
4 Consent for Publication

5 Not applicable.  
6  
7  
8  
9

10  
11 Availability of Data and Materials

12  
13 Transcripts will not be shared for online access to protect the anonymity of the participants. Readers  
14 who wish to gain access to the data can write to the corresponding author.  
15  
16  
17

18  
19 Abbreviations

20  
21 FD Family doctor  
22  
23 FDCS Family Doctor Contract Services  
24  
25 CHC Community Health Service Center  
26  
27  
28

29 Figure legends

30  
31 Figure 1 Process of the mixed methods research. It intuitively reflects the purpose of our research,  
32 the main content and methods of each stage.  
33

34  
35 Figure 2 Schematic diagram of the relationships between the roles of FDs and the barriers. It  
36 shows the relationship of six unique roles of FDs in the contracted services for the disabled elderly,  
37 three interior barriers and three outer barriers. Interior barriers mainly arise from the FDs themselves,  
38 which directly affects the roles of FDs. Outer barriers mainly arise from the environment around the  
39 family doctors, includes policy environment of FDCS, working environment, which indirectly  
40 affects the roles of FDs.  
41  
42  
43  
44  
45  
46  
47  
48  
49  
50  
51  
52  
53  
54  
55  
56  
57  
58  
59  
60

## References

- [1] World Health Organization. Draft WHO global disability action plan 2014-2021: Better health for all people with disabilities[Z]. Geneva: World Health Organization, 2014.
- [2] Jiang, H., et al., Study on the Measurement and Influencing Factors of Care Service Demand of Disabled Elderly in Urban and Rural China. *International journal of environmental research and public health*, 2022. 19(17): p. 11112.
- [3] Fang EF, Xie C, Schenkel JA, et al. A research agenda for ageing in China in the 21st century (2nd edition): Focusing on basic and translational research, long-term care, policy and social networks. *Ageing Res Rev.* 2020;64:101174. doi:10.1016/j.arr.2020.101174.
- [4] Special Plan for Elderly Services in Beijing(2021-2035).
- [5] Nieboer A., Koolman X., Stolk E. Preferences for long-term care services: Willingness to pay estimates derived from a discrete choice experiment. *Soc. Sci. Med.* 2010;9:1317–1325. doi: 10.1016/j.socscimed.2009.12.027.
- [6] Hu H., Si Y., Li B. Decomposing Inequality in long-term care Need Among Older Adults with Chronic Diseases in China: A Life Course Perspective. *Int. J. Environ. Res. Public Health.* 2020;7:2559. doi: 10.3390/ijerph17072559.
- [7] Si M., Kong F., Wu J., Li S. Review on the demand of long-term care of the elderly and its influencing factors. *Chin. Health Serv. Manag.* 2018;2:157–160.
- [8] Liu Y., Feng Y., Wang Y. long-term care needs and influencing factors of the disabled elderly. *Chin. J. Gerontol.* 2016;6:1482–1484.
- [9] Bitton A, Ratcliffe HL, Veillard JH, et al. Primary Health Care as a Foundation for Strengthening Health Systems in Low- and Middle-Income Countries. *J Gen Intern Med.* 2017;32(5):566-571. doi:10.1007/s11606-016-3898-5.
- [10] Feng S, Cheng A, Luo Z, Xiao Y, Zhang L. Effect of family doctor contract services on patient perceived quality of primary care in southern China. *BMC Fam Pract.* 2020;21(1):218. Published 2020 Oct 24. doi:10.1186/s12875-020-01287-7.
- [11] Yuan, Shasha et al. “Facilitators and barriers to implement the family doctor contracting services in China: findings from a qualitative study.” *BMJ open* vol. 9,10 e032444. 8 Oct. 2019, doi:10.1136/bmjopen-2019-032444.

- 1  
2  
3  
4 [12] Liang, Cuiying et al. “The effects of gatekeeping on the quality of primary care in Guangdong  
5 Province, China: a cross-sectional study using primary care assessment tool-adult edition.” *BMC*  
6 *family practice* vol. 20,1 93. 4 Jul. 2019, doi:10.1186/s12875-019-0982-z.  
7  
8  
9 [13] Schwenkglenks, Matthias et al. “Economic efficiency of gate-keeping compared with fee for  
10 service plans: a Swiss example.” *Journal of epidemiology and community health* vol. 60,1 (2006):  
11 24-30. doi:10.1136/jech.2005.038240.  
12  
13 [14] van Loenen, Tessa et al. “Trends towards stronger primary care in three western European  
14 countries; 2006-2012.” *BMC family practice* vol. 17 59. 28 May. 2016, doi:10.1186/s12875-016-  
15 0458-3.  
16  
17 [15] Cuiling H, Juan S, Yaling L, Yao L, Nana L. Implementation status of the “1+1+1” type of  
18 contracted family doctor Services in Shanghai:a qualitative study. *Chinese Gen Pract.*  
19 2019;22(19):2308–2313.  
20  
21 [16] Nie, Zhiqiang et al. “Development and Validation of a Model to Predict the Contract Service  
22 of Family Doctor: A National Survey in China.” *Frontiers in public health* vol. 10 750722. 25 Apr.  
23 2022, doi:10.3389/fpubh.2022.750722.  
24  
25 [17] Notice of the General Office of the NHC on signing up family doctors for services in 2019  
26 [http://www.gov.cn/xinwen/2019-04/26/content\\_5386470.htm](http://www.gov.cn/xinwen/2019-04/26/content_5386470.htm).  
27  
28 [18] Schmalstieg-Bahr K, Popert UW, Scherer M. The Role of General Practice in Complex Health  
29 Care Systems. *Front Med (Lausanne)*. 2021;8:680695. Published 2021 Nov 25.  
30 doi:10.3389/fmed.2021.680695.  
31  
32 [19] Dumontet, Magali et al. “Gatekeeping and the utilization of physician services in France:  
33 Evidence on the Médecin traitant reform.” *Health policy (Amsterdam, Netherlands)* vol. 121,6  
34 (2017): 675-682. doi:10.1016/j.healthpol.2017.04.006.  
35  
36 [20] Wang, Lingjie, and Wenbin Liu. “Effects of Family Doctor Contract Services on the Health-  
37 Related Quality of Life Among Individuals With Diabetes in China: Evidence From the CHARLS.”  
38 *Frontiers in public health* vol. 10 865653. 4 May. 2022, doi:10.3389/fpubh.2022.865653.  
39  
40 [21] Feng, Shanshan et al. “Effect of family doctor contract services on patient perceived quality  
41 of primary care in southern China. ” *BMC family practice* vol. 21,1 218. 24 Oct. 2020,  
42 doi:10.1186/s12875-020-01287-7.  
43  
44 [22] Chaix, Basile et al. “ Access to general practitioner services: the disabled elderly lag behind  
45  
46  
47  
48  
49  
50  
51  
52  
53  
54  
55  
56  
57  
58  
59  
60

1  
2  
3  
4 in underserved areas. ” *European journal of public health* vol. 15,3 (2005): 282-7.  
5  
6 doi:10.1093/eurpub/cki082.

7 [23] Mathias, Kaaren et al. “ Multiple barriers to participation for people with psychosocial  
8 disability in Dehradun district, North India: a cross-sectional study.” *BMJ open* vol. 8,2 e019443.  
9  
10 27 Feb. 2018, doi:10.1136/bmjopen-2017-019443.

11 [24] Sakellariou, Dikaios, and Elena S Rotarou. “ Access to healthcare for men and women with  
12 disabilities in the UK: secondary analysis of cross-sectional data.” *BMJ open* vol. 7,8 e016614.  
13  
14 11 Sep. 2017, doi:10.1136/bmjopen-2017-016614.

15 [25] Wu, Dan et al. “ Health system reforms, violence against doctors and job satisfaction in the  
16 medical profession: a cross-sectional survey in Zhejiang Province, Eastern China.” *BMJ open* vol.  
17  
18 4,12 e006431. 31 Dec. 2014, doi:10.1136/bmjopen-2014-006431.

19 [26] Zhang, Tao, and Xiaohe Wang. “ Association of Continuity of General Practitioner Care with  
20 Utilisation of General Practitioner and Specialist Services in China: A Mixed-Method Study.”  
21  
22 *Healthcare (Basel, Switzerland)* vol. 9,9 1206. 13 Sep. 2021, doi:10.3390/healthcare9091206.

23 [27] Hansen, Anne Helen et al. “ Continuity of GP care is associated with lower use of  
24 complementary and alternative medical providers: a population-based cross-sectional survey.”  
25  
26 *BMC health services research* vol. 14 629. 10 Dec. 2014, doi:10.1186/s12913-014-0629-7.

27 [28] Denny, Elaine, and Annalise Weckesser. “ Qualitative research: what it is and what it is not:  
28 Study design: qualitative research.” *BJOG : an international journal of obstetrics and gynaecology*  
29  
30 vol. 126,3 (2019): 369. doi:10.1111/1471-0528.15198.

31 [29] Guest G, Namey E, Chen M. A simple method to assess and report thematic saturation in  
32 qualitative research. *PLoS ONE*. (2020) 15:e0232076. 10.1371/journal.pone.0232076.  
33  
34

35 [30] Boeije H. *Analysis in qualitative research*. London: Sage publications; 2009.

36 [31] de la Espriella R, Gómez Restrepo C. Grounded theory. *Teoría fundamentada. Rev Colomb*  
37  
38 *Psiquiatr (Engl Ed)*. 2020;49(2):127-133. doi:10.1016/j.rcp.2018.08.002.

39 [32] Chapman AL, Hadfield M, Chapman CJ. Qualitative research in healthcare: an introduction to  
40 grounded theory using thematic analysis. *J R Coll Physicians Edinb*. 2015;45(3):201-205.  
41  
42 doi:10.4997/JRCPE.2015.305.

43 [33] Rat C, Meunier-Beillard N, Moulard S, Denis F. Caregiver Representations of Therapeutic  
44 Patient Education Programmes for People with Schizophrenia: A Qualitative Study. *Healthcare*  
45  
46  
47  
48  
49  
50  
51  
52  
53  
54  
55  
56  
57  
58  
59  
60

(Basel). 2022 Aug 29;10(9):1644. doi: 10.3390/healthcare10091644. PMID: 36141256; PMCID: PMC9498836.

[34] Foley G, Timonen V. Using Grounded Theory Method to Capture and Analyze Health Care Experiences. *Health Serv Res*. 2015 Aug;50(4):1195-210. doi: 10.1111/1475-6773.12275. Epub 2014 Dec 18. PMID: 25523315; PMCID: PMC4545354.

[35] The developing family doctor system: evidence from the progress of the family doctor signing service from a longitudinal survey (2013 - 2016) in Pudong New Area, Shanghai.

[36] Goodwin R, Moffatt F, Hendrick P, Stynes S, Bishop A, Logan P. Evaluation of the First Contact Physiotherapy (FCP) model of primary care: a qualitative insight. *Physiotherapy*. 2021 Dec;113:209-216. doi: 10.1016/j.physio.2021.08.003. Epub 2021 Aug 6. PMID: 34583834; PMCID: PMC8612276.

[37] Yeung K, Dorsey CN, Mettert K. Effect of new Medicare enrollment on health, healthcare utilization, and cost: A scoping review. *J Am Geriatr Soc*. 2021;69(8):2335-2343. doi:10.1111/jgs.17113.

[38] O'Malley AS, Rich EC, Shang L, et al. New approaches to measuring the comprehensiveness of primary care physicians. *Health Serv Res*. 2019;54(2):356-366. doi:10.1111/1475-6773.13101.

[39] Humphrey Beebe L, Mixer SJ, Thompson K, et al. Transforming RN Roles in Community-Based Integrated Primary Care (TRIP): Background and Content. *Issues Ment Health Nurs*. 2019;40(4):347-353. doi:10.1080/01612840.2018.1553006.

[40] Wei Y, Wang F, Pan Z, Jin G, Wang D, Lu X, Cao Q. Work Content of General Practitioners in Beijing, China: A Multi-method Study. *Front Public Health*. 2022 Apr 29;10:870224. doi: 10.3389/fpubh.2022.870224. PMID: 35570960; PMCID: PMC9096235.

[41] Alexander JA, Cohen GR, Wise CG, Green LA. The policy context of patient centered medical homes: perspectives of primary care providers. *J Gen Intern Med*. 2013 Jan;28(1):147-53. doi: 10.1007/s11606-012-2135-0. Epub 2012 Jul 13. PMID: 22790613; PMCID: PMC3539022.

[42] Brown B, Cheraghi-Sohi S, Jaki T, Su TL, Buchan I, Sperrin M. Understanding clinical prediction models as 'innovations': a mixed methods study in UK family practice. *BMC Med Inform Decis Mak*. 2016 Aug 9;16:106. doi: 10.1186/s12911-016-0343-y. PMID: 27506547; PMCID: PMC4977891.

[43] Shi L, Lee DC, Chung M, Liang H, Lock D, Sripipatana A. Patient-Centered Medical Home

1  
2  
3  
4 Recognition and Clinical Performance in U.S. Community Health Centers. *Health Serv Res.* 2017  
5 Jun;52(3):984-1004. doi: 10.1111/1475-6773.12523. Epub 2016 Jun 20. PMID: 27324440; PMCID:  
6  
7  
8  
9  
10  
11  
12  
13  
14  
15  
16  
17  
18  
19  
20  
21  
22  
23  
24  
25  
26  
27  
28  
29  
30  
31  
32  
33  
34  
35  
36  
37  
38  
39  
40  
41  
42  
43  
44  
45  
46  
47  
48  
49  
50  
51  
52  
53  
54  
55  
56  
57  
58  
59  
60

[44] Ortiz MR. Patient-Centered Medical (Health) Home: Nursing Theory-Guided Policy Perspectives. *Nurs Sci Q.* 2020;33(1):91-96. doi:10.1177/0894318419881795.

[45] Gorry C. Cuba's Family Doctor-and-Nurse Teams: A Day in the Life. *MEDICC Rev.* 2017;19(1):6-9. doi:10.37757/MR2017.V19.N1.2

[46] Gorry C. Cuba's Family Doctor-and-Nurse Teams: A Day in the Life. *MEDICC Rev.* 2017;19(1):6-9. doi:10.37757/MR2017.V19.N1.2

[47] Vallejo-Torres L, Morris S. Primary care supply and quality of care in England. *Eur J Health Econ.* 2018 May;19(4):499-519. doi: 10.1007/s10198-017-0898-2. Epub 2017 May 30. PMID: 28560521; PMCID: PMC5913392.

[48] Buhtz C, Paulicke D, Schwarz K, Jahn P, Stoevesandt D, Frese T. Receptiveness Of GPs In The South Of Saxony-Anhalt, Germany To Obtaining Training On Technical Assistance Systems For Caregiving: A Cross-Sectional Study. *Clin Interv Aging.* 2019 Sep 17;14:1649-1656. doi: 10.2147/CIA.S218367. PMID: 31571844; PMCID: PMC6756162.

[49] van der Heiden W, Lacroix J, Moll van Charante EP, Beune E. GPs' views on the implementation of combined lifestyle interventions in primary care in the Netherlands: a qualitative study. *BMJ Open.* 2022 Feb 4;12(2):e056451. doi: 10.1136/bmjopen-2021-056451. PMID: 35121605; PMCID: PMC8819797.

[50] Kroneman M, Meeus P, Kringos DS, Groot W, van der Zee J. International developments in revenues and incomes of general practitioners from 2000 to 2010. *BMC Health Serv Res.* 2013 Oct 24;13:436. doi: 10.1186/1472-6963-13-436. PMID: 24152337; PMCID: PMC4015771.

[51] Suter E, Mallinson S, Misfeldt R, Boakye O, Nasmith L, Wong ST. Advancing team-based primary health care: a comparative analysis of policies in western Canada. *BMC Health Serv Res.* 2017 Jul 17;17(1):493. doi: 10.1186/s12913-017-2439-1. PMID: 28716120; PMCID: PMC5512982.

[52] Streit S, Verschoor M, Rodondi N, et al. Variation in GP decisions on antihypertensive treatment in oldest-old and frail individuals across 29 countries. *BMC Geriatr.* 2017;17(1):93. Published 2017 Apr 20. doi:10.1186/s12877-017-0486-4.

[53] Yellamaty V, Ball L, Crossland L, Jackson C. General practitioners with special interests: An

1  
2  
3  
4 integrative review of their role, impact and potential for the future. *Aust J Gen Pract.*  
5 2019;48(9):639-643. doi:10.31128/AJGP-02-19-4849.

6  
7 [54] Lee JQ, Loke W, Ng QX. The Role of Family Physicians in a Pandemic: A Blueprint.  
8 *Healthcare (Basel).* 2020;8(3):198. Published 2020 Jul 5. doi:10.3390/healthcare8030198.

9  
10 [55] Bayati M, Rashidian A, Sarikhani Y, Lohivash S. Income inequality among general  
11 practitioners in Iran: a decomposition approach. *BMC Health Serv Res.* 2019;19(1):620. Published  
12 2019 Sep 2. doi:10.1186/s12913-019-4473-7.

13  
14 [56] Iparraguirre J.L. Reductions in local government spending on community-based social care  
15 and unmet social care needs of older people in England. *J. Econ. Ageing.* 2017:100126. doi:  
16 10.1016/j.jeoa.2017.07.001.

17  
18 [57] Means R. A brave new world of personalized care? Historical perspectives on social care and  
19 older people in England. *Soc. Policy Adm.* 2012;46:302–320. doi: 10.1111/j.1467-  
20 9515.2011.00807.x.

21  
22 [58] Kroneman M, Meeus P, Kringos DS, Groot W, van der Zee J. International developments in  
23 revenues and incomes of general practitioners from 2000 to 2010. *BMC Health Serv Res.*  
24 2013;13:436. Published 2013 Oct 24. doi:10.1186/1472-6963-13-436.

25  
26 [59] Dumontet M, Le Vaillant M, Franc C. What determines the income gap between French male  
27 and female GPs - the role of medical practices. *BMC Fam Pract.* 2012;13:94. Published 2012 Sep  
28 21. doi:10.1186/1471-2296-13-94.

29  
30 [60] Zhang R, Zhang Z, Peng Y, Zhai S, Zhou J, Chen J. The multi-subject cooperation mechanism  
31 of home care for the disabled elderly in Beijing: a qualitative research. *BMC Prim Care.*  
32 2022;23(1):186. Published 2022 Jul 26. doi:10.1186/s12875-022-01777-w.



1  
2  
3  
4  
5  
6  
7  
8  
9  
10  
11  
12  
13  
14  
15  
16  
17  
18  
19  
20  
21  
22  
23  
24  
25  
26  
27  
28  
29  
30  
31  
32  
33  
34  
35  
36  
37  
38  
39  
40  
41  
42  
43  
44  
45  
46  
47  
48  
49  
50  
51  
52  
53  
54  
55  
56  
57  
58  
59  
60

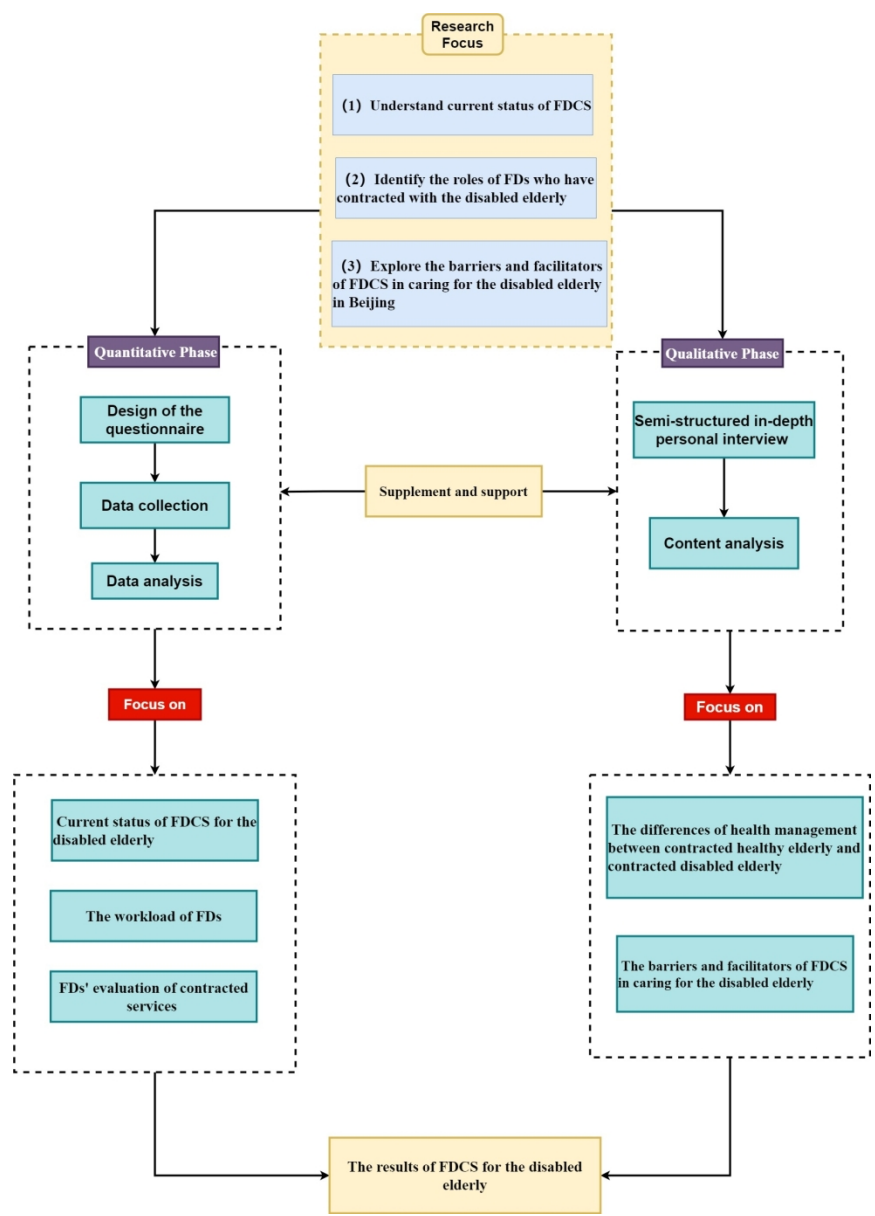

Process of the mixed methods research

602x841mm (72 x 72 DPI)

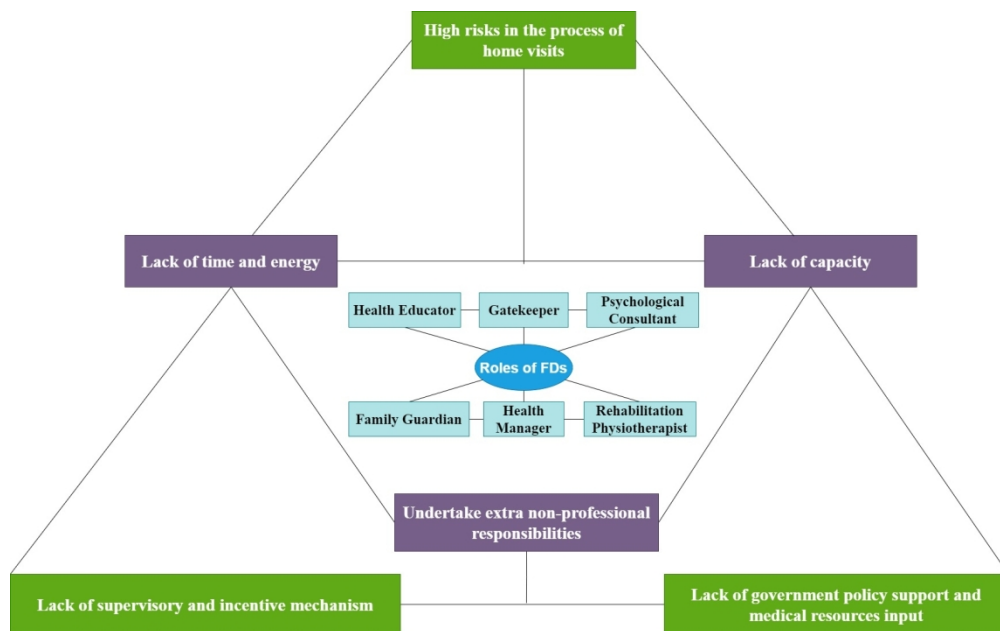

Schematic diagram of the relationships between the roles of FDs and the barriers.

614x383mm (72 x 72 DPI)

**Table 6 The analysis process of FDs from the interviews**

| Themes                                                                                  | Associated Sub-themes                        | Example of Verbatim Transcript                                                                                                                                                                                                                                                                                                                                 |
|-----------------------------------------------------------------------------------------|----------------------------------------------|----------------------------------------------------------------------------------------------------------------------------------------------------------------------------------------------------------------------------------------------------------------------------------------------------------------------------------------------------------------|
| Differences                                                                             | Health demands (25/30)                       | “.....the disabled elderly have greater health demands, particularly in the areas of Medicare and Medicaid.....” (FD, N7)                                                                                                                                                                                                                                      |
|                                                                                         | Service content (20/30)                      | “.....Disabled elderly people usually have trouble moving, so we have to provide home-visiting service for them.....” (FD, N5)                                                                                                                                                                                                                                 |
|                                                                                         | Level of humanistic care (17/30)             | “.....Most of disabled elderly people are rely on their families, they have little opportunity to communicate with others and receive less social support.....FDs should have more communication with the disabled elderly via WeChat or telephone, understand their physical and psychological conditions, and give them more empathetic care.....” (FD, N30) |
|                                                                                         | Personal energy input (15/30)                | “.....Compared with the contracted healthy elderly, we need invest more energy and time to provide care for the disabled elderly. For senior patients who are well, the diagnosis takes around 10 minutes, while the home visits we offer to those who are incapacitated take at least an hour.....” (FD, N13)                                                 |
|                                                                                         | Medical resources input (8/30)               | “.....The disabled elderly occupy more human and medical resources than contracted healthy elderly, especially the facilities and tools of diagnosis and treatment for home visits service.....” (FD, N21)                                                                                                                                                     |
|                                                                                         | Level of service difficulty and risks (7/30) | “.....Care services for the disabled elderly are more difficult due to their complex physical condition. Besides, as risk of home visits service is high, some professional services cannot be offered at the disabled elderly’s home.....” (FD, N23)                                                                                                          |
|                                                                                         | Facilitators                                 | Establishing doctor-patient trust relationship (24/30)                                                                                                                                                                                                                                                                                                         |
| Improving the health knowledge of the disabled elderly and their families (20/30)       |                                              | “..... FDs will regularly hold regular lectures on health knowledge for the disabled elderly and their families, and we will teach some nursing skills for them to deal with emergencies.....” (FD, N9)                                                                                                                                                        |
| Improve the frequency of communication between doctors and the disabled elderly (18/30) |                                              | “.....Except for telephone follow-up, I have added patients’ WeChat through which I could ask their physical and mental conditions every day.....” (FD, N25)                                                                                                                                                                                                   |
| Lightening the financial burden of the disabled elderly and their families (16/30)      |                                              | “.....The disabled elderly and their families bear a huge economic and emotional burden, FDs can greatly solve the problems of the disabled elderly and their families, facilitate their lives and relieve their economic pressure.....” (FD, N16)                                                                                                             |
| Developing humanistic care services (13/30)                                             |                                              | “.....The disabled elderly have no the ability to look after themselves and lack the initiative to manage                                                                                                                                                                                                                                                      |

|    |                                                            |                                                                                                                 |
|----|------------------------------------------------------------|-----------------------------------------------------------------------------------------------------------------|
| 1  |                                                            | their own health, so as FDs, we should pay more attention on them and provide more humanistic care              |
| 2  |                                                            | services, such as psychological counseling.....” (FD, N6)                                                       |
| 3  |                                                            |                                                                                                                 |
| 4  |                                                            |                                                                                                                 |
| 5  |                                                            |                                                                                                                 |
| 6  |                                                            |                                                                                                                 |
| 7  |                                                            |                                                                                                                 |
| 8  | Improve the efficiency of medical resources (9/30)         | “.....FDCS has greatly eased the pressure of local hospitals. Through home visits services, most of the         |
| 9  |                                                            | medical needs of the disabled elderly people can be met, and the waste of medical resources can be              |
| 10 |                                                            | avoided.....” (FD, N24)                                                                                         |
| 11 |                                                            |                                                                                                                 |
| 12 |                                                            |                                                                                                                 |
| 13 | Barriers                                                   |                                                                                                                 |
| 14 | Short of hands (23/30)                                     | “.....The staff shortage of FD team is a thorny problem. If the salary is not properly distributed, human       |
| 15 |                                                            | resources will be insufficient.....” (FD, N5)                                                                   |
| 16 |                                                            |                                                                                                                 |
| 17 | High risks of home visits service (17/30)                  | “.....There are many risks on home visits service. Whether we go to the homes of the disabled elderly or        |
| 18 |                                                            | conduct home visiting service in their home, we are faced with many threats.....” (FD, N2)                      |
| 19 |                                                            |                                                                                                                 |
| 20 |                                                            |                                                                                                                 |
| 21 | Lack of continuity in FDCS (15/30)                         | “.....The FDCS just sustain one year, the contractual relationship between FDs and the disabled elderly is      |
| 22 |                                                            | not very close, some disabled elderly people who I am responsible for them this year, but I may not             |
| 23 |                                                            | manage their health next year. The continuity of FDCS cannot be effectively guaranteed.....” (FD, N17)          |
| 24 |                                                            |                                                                                                                 |
| 25 |                                                            |                                                                                                                 |
| 26 |                                                            |                                                                                                                 |
| 27 | Lack of government policy support (11/30)                  | “.....FDCS lack the support of government policy, and the medical resources in Beijing are unevenly             |
| 28 |                                                            | distributed.....our CHC lack basic inspection facilities, which brings a lot of inconvenience to conduct FD     |
| 29 |                                                            | contract services.....” (FD, N8)                                                                                |
| 30 |                                                            |                                                                                                                 |
| 31 |                                                            |                                                                                                                 |
| 32 |                                                            |                                                                                                                 |
| 33 | Poor compliance of the disabled elderly and their families | “..... Most of the disabled elderly and their family are very cooperative with our work, but some patients      |
| 34 | (8/30)                                                     | will put forward additional requirements beyond the scope of FDCS, which are hard to meet. So there are         |
| 35 |                                                            | some complaints from the disabled elderly and their families.....” (FD, N11)                                    |
| 36 |                                                            |                                                                                                                 |
| 37 |                                                            |                                                                                                                 |
| 38 |                                                            |                                                                                                                 |
| 39 | Lack of supervisory and incentive policies for FDs (5/30)  | “..... Our FD team does not have a supervision and incentive policy.....My contribution is not directly         |
| 40 |                                                            | proportional to my income, and most of the services for the disabled elderly are promoted by my                 |
| 41 |                                                            | responsibility.....” (FD, N3)                                                                                   |
| 42 |                                                            |                                                                                                                 |
| 43 |                                                            |                                                                                                                 |
| 44 |                                                            |                                                                                                                 |
| 45 | Insufficient publicity of FDCS (4/30)                      | “.....The propagation intensity of FDCS is a long way to go, many the disabled elderly and their families       |
| 46 |                                                            | misunderstand our work, which has brought a lot of troubles to FDs.....” (FD, N)                                |
| 47 |                                                            |                                                                                                                 |
| 48 |                                                            |                                                                                                                 |
| 49 | Shift more care responsibility on FDs (3/30)               | “.....The family members of the disabled elderly believe that FDs should take responsible to the health of      |
| 50 |                                                            | the elderly. With my help, they pay less attention to the elderly, trying to evade their care responsibilities. |
| 51 |                                                            | Sometimes I feel like I’m being filial to the disabled elderly.....” (FD, N10)                                  |
| 52 |                                                            |                                                                                                                 |
| 53 |                                                            |                                                                                                                 |
| 54 |                                                            |                                                                                                                 |
| 55 |                                                            |                                                                                                                 |
| 56 |                                                            |                                                                                                                 |
| 57 |                                                            |                                                                                                                 |
| 58 |                                                            |                                                                                                                 |
| 59 |                                                            |                                                                                                                 |
| 60 |                                                            |                                                                                                                 |

## STROBE Statement—checklist of items that should be included in reports of observational studies

|                              | Item No | Recommendation                                                                                                                                                                                                                                                                                                                                                                                                                                                         | Page No |
|------------------------------|---------|------------------------------------------------------------------------------------------------------------------------------------------------------------------------------------------------------------------------------------------------------------------------------------------------------------------------------------------------------------------------------------------------------------------------------------------------------------------------|---------|
| <b>Title and abstract</b>    | 1       | (a) Indicate the study's design with a commonly used term in the title or the abstract                                                                                                                                                                                                                                                                                                                                                                                 | 1       |
|                              |         | (b) Provide in the abstract an informative and balanced summary of what was done and what was found                                                                                                                                                                                                                                                                                                                                                                    | 1,2     |
| <b>Introduction</b>          |         |                                                                                                                                                                                                                                                                                                                                                                                                                                                                        |         |
| Background/rationale         | 2       | Explain the scientific background and rationale for the investigation being reported                                                                                                                                                                                                                                                                                                                                                                                   | 3       |
| Objectives                   | 3       | State specific objectives, including any prespecified hypotheses                                                                                                                                                                                                                                                                                                                                                                                                       | 4       |
| <b>Methods</b>               |         |                                                                                                                                                                                                                                                                                                                                                                                                                                                                        |         |
| Study design                 | 4       | Present key elements of study design early in the paper                                                                                                                                                                                                                                                                                                                                                                                                                | 4       |
| Setting                      | 5       | Describe the setting, locations, and relevant dates, including periods of recruitment, exposure, follow-up, and data collection                                                                                                                                                                                                                                                                                                                                        | 5       |
| Participants                 | 6       | (a) <i>Cohort study</i> —Give the eligibility criteria, and the sources and methods of selection of participants. Describe methods of follow-up<br><i>Case-control study</i> —Give the eligibility criteria, and the sources and methods of case ascertainment and control selection. Give the rationale for the choice of cases and controls<br><i>Cross-sectional study</i> —Give the eligibility criteria, and the sources and methods of selection of participants | 5,7     |
|                              |         | (b) <i>Cohort study</i> —For matched studies, give matching criteria and number of exposed and unexposed<br><i>Case-control study</i> —For matched studies, give matching criteria and the number of controls per case                                                                                                                                                                                                                                                 | 6,7     |
| Variables                    | 7       | Clearly define all outcomes, exposures, predictors, potential confounders, and effect modifiers. Give diagnostic criteria, if applicable                                                                                                                                                                                                                                                                                                                               | 6,7     |
| Data sources/<br>measurement | 8*      | For each variable of interest, give sources of data and details of methods of assessment (measurement). Describe comparability of assessment methods if there is more than one group                                                                                                                                                                                                                                                                                   | 6,7     |
| Bias                         | 9       | Describe any efforts to address potential sources of bias                                                                                                                                                                                                                                                                                                                                                                                                              | 6,7     |
| Study size                   | 10      | Explain how the study size was arrived at                                                                                                                                                                                                                                                                                                                                                                                                                              | 6,8     |
| Quantitative variables       | 11      | Explain how quantitative variables were handled in the analyses. If applicable, describe which groupings were chosen and why                                                                                                                                                                                                                                                                                                                                           | 6       |
| Statistical methods          | 12      | (a) Describe all statistical methods, including those used to control for confounding                                                                                                                                                                                                                                                                                                                                                                                  | N/A     |
|                              |         | (b) Describe any methods used to examine subgroups and interactions                                                                                                                                                                                                                                                                                                                                                                                                    | N/A     |
|                              |         | (c) Explain how missing data were addressed                                                                                                                                                                                                                                                                                                                                                                                                                            | N/A     |
|                              |         | (d) <i>Cohort study</i> —If applicable, explain how loss to follow-up was addressed<br><i>Case-control study</i> —If applicable, explain how matching of cases and controls was addressed<br><i>Cross-sectional study</i> —If applicable, describe analytical methods taking account of sampling strategy                                                                                                                                                              | 7,8     |
|                              |         | (e) Describe any sensitivity analyses                                                                                                                                                                                                                                                                                                                                                                                                                                  | 7,8     |

Continued on next page

| <b>Results</b>           |         |                                                                                                                                                                                                              |           |
|--------------------------|---------|--------------------------------------------------------------------------------------------------------------------------------------------------------------------------------------------------------------|-----------|
| Participants             | 13<br>* | (a) Report numbers of individuals at each stage of study—eg numbers potentially eligible, examined for eligibility, confirmed eligible, included in the study, completing follow-up, and analysed            | 6,7       |
|                          |         | (b) Give reasons for non-participation at each stage                                                                                                                                                         | 6,7       |
|                          |         | (c) Consider use of a flow diagram                                                                                                                                                                           | 4         |
| Descriptive data         | 14<br>* | (a) Give characteristics of study participants (eg demographic, clinical, social) and information on exposures and potential confounders                                                                     | 9,15      |
|                          |         | (b) Indicate number of participants with missing data for each variable of interest                                                                                                                          | 6,7       |
|                          |         | (c) <i>Cohort study</i> —Summarise follow-up time (eg, average and total amount)                                                                                                                             | N/A       |
| Outcome data             | 15<br>* | <i>Cohort study</i> —Report numbers of outcome events or summary measures over time                                                                                                                          | N/A       |
|                          |         | <i>Case-control study</i> —Report numbers in each exposure category, or summary measures of exposure                                                                                                         | N/A       |
|                          |         | <i>Cross-sectional study</i> —Report numbers of outcome events or summary measures                                                                                                                           | 6,7       |
| Main results             | 16      | (a) Give unadjusted estimates and, if applicable, confounder-adjusted estimates and their precision (eg, 95% confidence interval). Make clear which confounders were adjusted for and why they were included | 14        |
|                          |         | (b) Report category boundaries when continuous variables were categorized                                                                                                                                    | N/A       |
|                          |         | (c) If relevant, consider translating estimates of relative risk into absolute risk for a meaningful time period                                                                                             | N/A       |
| Other analyses           | 17      | Report other analyses done—eg analyses of subgroups and interactions, and sensitivity analyses                                                                                                               | 16        |
| <b>Discussion</b>        |         |                                                                                                                                                                                                              |           |
| Key results              | 18      | Summarise key results with reference to study objectives                                                                                                                                                     | 21,2<br>2 |
| Limitations              | 19      | Discuss limitations of the study, taking into account sources of potential bias or imprecision. Discuss both direction and magnitude of any potential bias                                                   | 25        |
| Interpretation           | 20      | Give a cautious overall interpretation of results considering objectives, limitations, multiplicity of analyses, results from similar studies, and other relevant evidence                                   | 25        |
| Generalisability         | 21      | Discuss the generalisability (external validity) of the study results                                                                                                                                        | 23,2<br>4 |
| <b>Other information</b> |         |                                                                                                                                                                                                              |           |
| Funding                  | 22      | Give the source of funding and the role of the funders for the present study and, if applicable, for the original study on which the present article is based                                                | 26        |

\*Give information separately for cases and controls in case-control studies and, if applicable, for exposed and unexposed groups in cohort and cross-sectional studies.

**Note:** An Explanation and Elaboration article discusses each checklist item and gives methodological background and published examples of transparent reporting. The STROBE checklist is best used in conjunction with this article (freely available on the Web sites of PLoS Medicine at <http://www.plosmedicine.org/>, Annals of Internal Medicine at <http://www.annals.org/>, and Epidemiology at <http://www.epidem.com/>). Information on the STROBE Initiative is available at [www.strobe-statement.org](http://www.strobe-statement.org).

# BMJ Open

## The Barriers and Facilitators of Family Doctor Contract Services in Caring for Disabled Older Adults in Beijing, China: A Mixed Methods Study

|                                 |                                                                                                                                                                                                                                                                                                                                                                                                                                                                                                                                                                                                                                                                                                                     |
|---------------------------------|---------------------------------------------------------------------------------------------------------------------------------------------------------------------------------------------------------------------------------------------------------------------------------------------------------------------------------------------------------------------------------------------------------------------------------------------------------------------------------------------------------------------------------------------------------------------------------------------------------------------------------------------------------------------------------------------------------------------|
| Journal:                        | <i>BMJ Open</i>                                                                                                                                                                                                                                                                                                                                                                                                                                                                                                                                                                                                                                                                                                     |
| Manuscript ID                   | bmjopen-2022-070130.R1                                                                                                                                                                                                                                                                                                                                                                                                                                                                                                                                                                                                                                                                                              |
| Article Type:                   | Original research                                                                                                                                                                                                                                                                                                                                                                                                                                                                                                                                                                                                                                                                                                   |
| Date Submitted by the Author:   | 04-Apr-2023                                                                                                                                                                                                                                                                                                                                                                                                                                                                                                                                                                                                                                                                                                         |
| Complete List of Authors:       | Zhang, Zhiying; Capital Medical University, School of Medical Humanities<br>Zhang, Ruyi; Capital Medical University Affiliated Beijing Ditan Hospital, Ethics Committee Office<br>Peng, Yingchun; Capital Medical University, School of Medical Humanities<br>Zhai, Shaoqi; Capital Medical University, School of Medical Humanities<br>Zhang, Jiaying; Capital Medical University, School of Medical Humanities<br>Jin, Qilin; People's Hospital of Beijing Daxing District<br>Zhou, Jiaojiao; Fengtai District Xiluoyuan Community Health Service Center<br>Li, Hanlin; Capital Medical University, School of Basic Medical Science<br>Chen, Jingjing; Huairou District Liulimiao Community Health Service Center |
| <b>Primary Subject Heading</b>: | Health services research                                                                                                                                                                                                                                                                                                                                                                                                                                                                                                                                                                                                                                                                                            |
| Secondary Subject Heading:      | General practice / Family practice                                                                                                                                                                                                                                                                                                                                                                                                                                                                                                                                                                                                                                                                                  |
| Keywords:                       | Quality in health care < HEALTH SERVICES ADMINISTRATION & MANAGEMENT, HEALTH SERVICES ADMINISTRATION & MANAGEMENT, Organisation of health services < HEALTH SERVICES ADMINISTRATION & MANAGEMENT, Health Services for the Aged                                                                                                                                                                                                                                                                                                                                                                                                                                                                                      |
|                                 |                                                                                                                                                                                                                                                                                                                                                                                                                                                                                                                                                                                                                                                                                                                     |

SCHOLARONE™  
Manuscripts

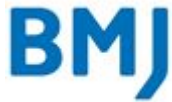

I, the Submitting Author has the right to grant and does grant on behalf of all authors of the Work (as defined in the below author licence), an exclusive licence and/or a non-exclusive licence for contributions from authors who are: i) UK Crown employees; ii) where BMJ has agreed a CC-BY licence shall apply, and/or iii) in accordance with the terms applicable for US Federal Government officers or employees acting as part of their official duties; on a worldwide, perpetual, irrevocable, royalty-free basis to BMJ Publishing Group Ltd ("BMJ") its licensees and where the relevant Journal is co-owned by BMJ to the co-owners of the Journal, to publish the Work in this journal and any other BMJ products and to exploit all rights, as set out in our [licence](#).

The Submitting Author accepts and understands that any supply made under these terms is made by BMJ to the Submitting Author unless you are acting as an employee on behalf of your employer or a postgraduate student of an affiliated institution which is paying any applicable article publishing charge ("APC") for Open Access articles. Where the Submitting Author wishes to make the Work available on an Open Access basis (and intends to pay the relevant APC), the terms of reuse of such Open Access shall be governed by a Creative Commons licence – details of these licences and which [Creative Commons](#) licence will apply to this Work are set out in our licence referred to above.

Other than as permitted in any relevant BMJ Author's Self Archiving Policies, I confirm this Work has not been accepted for publication elsewhere, is not being considered for publication elsewhere and does not duplicate material already published. I confirm all authors consent to publication of this Work and authorise the granting of this licence.



1  
2  
3  
4 **1 The Barriers and Facilitators of Family Doctor Contract Services in Caring for**  
5 **2 Disabled Older Adults in Beijing, China: A Mixed Methods Study**

6  
7 Zhiying Zhang<sup>1#</sup>, Ruyi Zhang<sup>2#</sup>, Yingchun Peng<sup>1\*</sup>, Shaoqi Zhai<sup>1</sup>, Jiaying Zhang<sup>1</sup>, Qilin Jin<sup>3</sup>, Jiaojiao  
8  
9 Zhou<sup>4</sup>, Hanlin Li<sup>5</sup>, Jingjing Chen<sup>6</sup>

10  
11  
12 \*Correspondence: [pycjq@ccmu.edu.cn](mailto:pycjq@ccmu.edu.cn) ORCID ID : 0000-0002-2168-5155

13  
14 # Zhiying Zhang and Ruyi Zhang contributed equally to this work

15  
16 <sup>1</sup> School of Medical Humanities, Capital Medical University, No.10, Xitoutiao, You An Men Wai,  
17  
18 Beijing 100069, China

19  
20 <sup>2</sup> Ethics Committee Office, Beijing Ditan Hospital, Capital Medical University, No. 8 Jingshun  
21  
22 East Street, Chaoyang District, Beijing 100015, China

23  
24 <sup>3</sup> Cardiac Surgery Department, People's Hospital of Beijing Daxing District, No.26, Huangcun  
25  
26 West Street, Daxing District, Beijing

27  
28 <sup>4</sup> Fengtai District Xiluoyuan Community Health Service Center, Beijing, China

29  
30 <sup>5</sup> School of Basic Medical Science, Capital Medical University, No.10, Xitoutiao, You An Men  
31  
32 Wai, Beijing 100069, China

33  
34 <sup>6</sup> Huairou District Liulimiao Community Health Service Center, Beijing, China

35  
36 **Abstract**

37  
38 **Objective** To evaluate the current state of family doctor contract services(FDCS) in Beijing,  
39  
40 identify the roles of family doctors who have worked with disabled older adults and investigate the  
41  
42 barriers and facilitators faced by family doctors in providing care for them.

43  
44 **Design** A convergent mixed methods study was carried out from October 2020 to January 2021 to  
45  
46 collect and analyze both quantitative and qualitative data. The integration strategies in this study  
47  
48 was connecting the results of the quantitative phase to data collection of the qualitative phase.

49  
50 **Setting** A multi-stage sampling strategy was used to select 15 community health centers (CHCs) in  
51  
52 four districts of Beijing. Of the four districts, two were from urban areas and two were from rural  
53  
54 areas.

55  
56 **Participants** The inclusion criteria for participants were(1) family doctors, (2) contracted with  
57  
58 disabled older adults,( 3) engaged in the related work for disabled older adults more the 6 months.

59  
60 **Methods** A cluster sampling of 283 family doctors was used in the questionnaire. A purposive

1  
2  
3  
4 30 sample of 30 family doctors from the same CHCs was selected during the same period. Frequency  
5  
6 31 and rank, rank sum test, K-W test were used in qualitative data analysis, the views of the  
7  
8 32 interviewees were analyzed through the thematic framework method.

9  
10 33 **Results** Currently, family doctors provided various services to satisfy the health needs of disabled  
11  
12 34 older adults, while the utilization of FDCS for disabled older adults is affected by many factors. The  
13  
14 35 differences of the importance of family doctors' role ( $P < 0.001$ ) and service satisfaction ( $P = 0.004$ )  
15  
16 36 were significant among four districts. Compared with contracted health senior citizens, this study  
17  
18 37 has identified five unique roles of family doctors, including "psychological consultant",  
19  
20 38 "rehabilitation physiotherapist", "health educator", "health manager", and "family health guardian".  
21  
22 39 Moreover, family doctors are confronted with a myriad of barriers (including high risks in the  
23  
24 40 process of home visits, a lack of supervisory and incentive mechanisms, insufficiency of time and  
25  
26 41 energy, etc) and facilitators (including establishing a doctor-patient trust relationship, developing  
27  
28 42 humanistic care services, etc) in the FDCS for disabled older adults.

29 43 **Conclusions** Family doctors play a pivotal role in the FDCS for disabled older adults, while the  
30  
31 44 effect and quality of FDCS in China needs to be improved. It is suggested that further research needs  
32  
33 45 to focus on solving existing barriers of FDCS to optimize the health of disabled older adults and  
34  
35 46 improve the quality of their lives.

36  
37 47 **Keywords:** barriers, contract services, disabled older adults, facilitators, family doctors, roles

#### 38 39 48 **Strengths and Limitations**

- 40  
41 49 ■ This study is the first time to identify the roles of family doctors in FDCS for disabled older  
42  
43 50 adults in Beijing.
- 44  
45 51 ■ This study has discovered the interests and demands of family doctors as well as potential  
46  
47 52 obstacles and enablers in the implementation of FDCS for disabled older adults.
- 48  
49 53 ■ This study has examined many aspects of the current FDCS for disabled older adults in Beijing,  
50  
51 54 and enriched the international discussion of similar topics.
- 52  
53 55 ■ This study were collected data from one sector of healthcare provider does not cover the  
54  
55 56 perspective of all stakeholders in FDCS.
- 56  
57 57 ■ The representativeness of this study was limited since only a sample of family doctors in 4  
58  
59 58 districts chosen from 16 in Beijing.

#### 60 59 **1. Introduction**

1  
2  
3  
4 60 With the global escalation of the aging process and the extension of average life expectancy, more  
5  
6 61 and more older adults tend to face a high risk of disability. *The World Report on Disability*  
7  
8 62 manifested that there are more than 1000 million people with disabilities in the world, and disability  
9  
10 63 disproportionately exerts a profound influence on vulnerable populations, in particular, the older  
11  
12 64 adults [1]. At the end of 2020, there are more than 85 million people living with some type of  
13  
14 65 disability in China [2]. Among them, the population of disabled older adults has reached 26.28  
15  
16 66 million, accounting for 9.95% of the overall aging population [3]. Beijing, as a typical example, is  
17  
18 67 characterized by advanced age and a high disability rate. In 2021, there are about 205,000 disabled  
19  
20 68 older adults in Beijing, the disability rate of the senior citizens is 4.78% and the older adults with  
21  
22 69 moderate or severe disability account for 70% of the whole disabled older adults [4].

23  
24 70 The disabled older adults, as a priority group of society, have extremely complex conditions and  
25  
26 71 diversified needs. Nieboer A. et al. found that different aging groups have different values for long-  
27  
28 72 term care services [5]. Important factors including the physical, mental, and family financial  
29  
30 73 conditions of disabled older adults have a significant influence on their choice of health and care  
31  
32 74 services [6,7]. A related study indicates that the disabled older adults' care not only need daily care,  
33  
34 75 but also medical care and rehabilitation training care services [8]. Due to poor physical conditions,  
35  
36 76 many disabled old individuals have difficulty moving, they hardly can go to the hospital by  
37  
38 77 themselves. Community health centers(CHCs) may become the only way for them to obtain medical  
39  
40 78 treatment. Moreover, most older adults with severe disabilities have lost normal physiological  
41  
42 79 functions, they have to rely on external devices, such as a gastric tube, and a urinary catheter to  
43  
44 80 support their daily physical needs. However, changing the gastric tube or urinary catheter is a knotty  
45  
46 81 problem for those bedridden people and their families. Therefore, satisfying the health and care  
47  
48 82 needs and improving the basic living conditions of disabled older adults is not only an urgent needs  
49  
50 83 of the senior and their families, but also a serious social issue to be considered.

51  
52 84 To address the challenges of rapid growth and massive demand of the older adults with disability,  
53  
54 85 China has released a series of policies. *The Law of the People's Republic of China on the Protection*  
55  
56 86 *of the Rights and Interests of Elderly(2012)*, which clearly stated that local government at all levels  
57  
58 87 should give care subsidies to older adults who are unable to take care of themselves for a long time  
59  
60 88 or have difficulties in finance based on their disability level. In 2016, the State Council Medical  
89 Reform Office and other seven ministries launched the Guiding Opinions on Promoting Family

1  
2  
3  
4 90 Doctor Contract Services(FDCS), it marked the formal implementation of FDCS in China and had  
5  
6 91 a positive significance for enhancing the health level of community residents and achieving the goal  
7  
8 92 of hierarchical diagnosis treatment. The National Health Commission in 2019 gave further guidance  
9  
10 93 on FDCS, which required family doctors to provide door-to-door medical and health services for  
11  
12 94 disabled older adults, terminally ill patients and other people who are in urgent need, and extend the  
13  
14 95 contracted services from institutions to communities and families [9]. In 2022, the State Council  
15  
16 96 issued *a guideline to promote the development of national undertakings for the aged and improve*  
17  
18 97 *the elderly care service system during the 14th Five-Year Plan period (2021-2025)*, which  
19  
20 98 encouraged medical and health institutions providing FDCS such as family care beds or home visits  
21  
22 99 to solve the basic care needs of disabled older adults. With relevant policies on disabled older adults  
23  
24 100 released in recent years, the living conditions and lives quality of disabled older adults have  
25  
26 101 improved. However, currently, China has not yet established a long-term care system for disabled  
27  
28 102 older adults due to lots of factors, such as lack of qualified professionals, limited service types, and  
29  
30 103 unrealized integrated care, etc [10].

31 104 As a core component of the primary healthcare system, FDCS is the most available health care  
32  
33 105 services to cater to older adults' long-term care needs in China[11]. Like other developed countries,  
34  
35 106 such as US, UK and Germany, family doctors play a more and more vital role in the primary care  
36  
37 107 system [12]. As the gatekeeper of residents' health, family doctors play six roles in the primary care  
38  
39 108 system, including triage and treatment, resource allocation, surveillance and monitoring, preventive  
40  
41 109 care, integrated care, and continuity of care [13~15]. By utilizing FDCS, family doctors in CHCs  
42  
43 110 establish a long-lasting, ongoing, and stable contractual relationship with disabled older adults. And  
44  
45 111 it is natural to provide medical care, and essential public health management services for them,  
46  
47 112 including establishing health records, physical examinations, chronic disease follow-ups, etc. At  
48  
49 113 end of 2021, there are 1435 million family doctors across the whole country and they have formed  
50  
51 114 431 thousand teams to provide FDCS for residents. As one of the first pilot areas of FDCS, Beijing's  
52  
53 115 contracted residents have reached 8.016 million in 2021, and the signing rate of key groups has  
54  
55 116 remained above 90% [16].

56 117 Although the number of contracted residents is increasing every year, the overall performance of  
57  
58 118 utilizing FDCS at CHCs is in a bad condition. Previous studies have shown that FDCS is plagued  
59  
60 119 with severe problems, such as lack of community health resources, the shortage of family doctors

1  
2  
3  
4 120 [17], the low awareness of contracted residents to FDCS [18], and the absence of supporting policies  
5  
6 121 [12], which results in the actual utilization of FDCS has not increased. Meanwhile, the current effect  
7  
8 122 of utilizing FDCS for disabled older adults is not obvious in Beijing due to limited medical resources,  
9  
10 123 less service types of FDCS, and low contract spirit between doctors and patients [19].

11 124 Family doctors, as ideal medical service providers, are expected to take a pivotal role in the  
12  
13 125 provision of medical care services for the disabled older adults and meet the disabled older adults'  
14  
15 126 diversified needs. However, no previous study has explored the roles of family doctors in the process  
16  
17 127 of providing FDCS for disabled older adults, and there is less research to figure out what barriers  
18  
19 128 and facilitators of FDCS will have in the process of caring for disabled older adults based on the  
20  
21 129 viewpoints of healthcare providers. To solve the dilemma of FDCS and let family doctors provide  
22  
23 130 more high quality services for disabled older adults, this study is the first to identify the roles of  
24  
25 131 family doctors contracted with disabled older adults in Beijing and investigated the barriers and  
26  
27 132 facilitators of utilizing FDCS from the perspectives of family doctors.

## 29 133 **2. Materials and Methods**

### 30 134 **2.1 Study design and sample selection**

31  
32  
33 135 A questionnaire survey and semi-structured interviews were carried out on family doctors in the  
34  
35 136 CHCs of Beijing, the capital city of China, from October 2020 to January 2021. A multistage  
36  
37 137 sampling strategy was adopted [20]. In the first stage, 4 districts of Beijing (2 from urban areas,  
38  
39 138 namely Xicheng District, Fengtai District; 2 from rural areas, namely Daxing District, and Huairou  
40  
41 139 District) were selected based on the level of economic development and the linear distance from  
42  
43 140 Tiananmen Square. The prominent feature of Xicheng District is the functional core area of Beijing.  
44  
45 141 As one of six urban districts of Beijing, Xicheng District is the core bearing area of political center  
46  
47 142 and cultural center, the protection of famous historical and cultural city, and also is "an important  
48  
49 143 window" to reflect the national image and international communication. Fengtai District is the  
50  
51 144 central city area of Beijing. It is positioned as "an important guaranteed area for supply high quality  
52  
53 145 life services in the capital" from the Beijing City Master Plan. Daxing District is located in the  
54  
55 146 southeast of Beijing, which is an important base of agricultural and sideline food production.  
56  
57 147 Huairou District is one of rural areas of Beijing, located in the northeast of cities. It has many  
58  
59 148 mountains, which formed the natural barrier of Beijing. Huairou District also is called the Green  
60  
149 Great Wall of Beijing. In the second stage, 3~4 CHCs were selected in each district based on the

1  
2  
3  
4 150 status of utilizing family doctor contract services, a total of 15 CHCs participated in our research.  
5  
6 151 In the third stage, due to 3~5 family doctor teams in each CHC, and the family doctor team was  
7  
8 152 composed of three medical-nursing-prevention personnel, so all the family doctor teams were  
9  
10 153 selected by using cluster sampling method. There were a total of 283 family doctors participating  
11  
12 154 in this study. At the same period, 2~3 family doctors were selected from 15 CHCs by purposive  
13  
14 155 sampling method and joined in-depth interview. Lastly, the research team(one graduate tutor and  
15  
16 156 three graduate students ) went to each sampling CHC to conduct this study [21,22].

17 157 Convergent mixed methods [23,24]were used in data collection and the analytical process, which  
18  
19 158 collected and analyzed qualitative and quantitative data independently and simultaneously, and  
20  
21 159 evaluated and combined with qualitative and quantitative results. The process of mixed methods is  
22  
23 160 shown in Figure 1 and described in detail below.

24  
25 161

26  
27 162

28  
29 163 In the quantitative phase, a cross-sectional survey using a self-designed questionnaire was  
30  
31 164 conducted on family doctors. The self-designed questionnaire mainly investigated the current status  
32  
33 165 of FDCS for disabled older adults, including the utilization of FDCS, the workload for home visits  
34  
35 166 by family doctors, and the performance evaluation of FDCS based on the family doctors.

36  
37 167 In the qualitative phase, a one-to-one and semi-structured in-depth personal interview for family  
38  
39 168 doctors was utilized to supplement and support the study. As thematic framework methods  
40  
41 169 adopted[25], the content of the interview mainly is to focalize two perspectives, one is the  
42  
43 170 differences in health management between contracted healthy senior citizens and disabled older  
44  
45 171 adults, and the other is the barriers and facilitators of FDCS in caring for disabled older adults.

46  
47 172 In this study, the quantitative phase and qualitative phase were conducted in parallel and then  
48  
49 173 integrated. The integration strategies in this study was connecting the results of the quantitative  
50  
51 174 phase to data collection of the qualitative phase. By using quantitative method to understand the  
52  
53 175 current status of FDCS in caring for disabled older adults and the main factors which affect family  
54  
55 176 doctors to provide contracted services for disabled older adults. Then based on the results of the  
56  
57 177 quantitative phase, this study further explored the roles of family doctors and barriers and  
58  
59 178 facilitators of FDCS in caring for disabled older adults. In this study, using both quantitative and  
60  
179 qualitative results made a better understanding of the roles and challenges faced by family doctors

1  
2  
3  
4 180 in the process of providing contracted services for disabled older adults and the factors associated  
5  
6 181 with better quality of FDCS for disabled older adults.

## 7 182 **2.2 Quantitative Phase**

9 183 Under the national and Beijing's relevant policies of FDCS for disabled older adults, the research  
10  
11 184 team has considered the humanistic environment, regional characteristics and the actual situation of  
12  
13 185 the contracted services in Beijing and compiled a self-designed questionnaire after an extensive  
14  
15 186 review of relevant literature and repeated discussion by panel experts. The questionnaire was revised  
16  
17 187 based on feedback from a pretest performed in one CHC. Moreover, the questionnaire design and  
18  
19 188 the whole process of questionnaire exploring were applied the Guideline Implementation Planning  
20  
21 189 Checklist developed by Gagliardi et al [26,27].

### 22 190 2.2.1 Instruments

23  
24  
25 191 To explore the status of FDCS for disabled older adults in Beijing, the questionnaire consisted of  
26  
27 192 four sections. The first part was a total of four questions regarding demographic characteristics of  
28  
29 193 family doctors, including gender, age, regions, education level and position title. The second part  
30  
31 194 was the utilization of family doctor contract services for disabled older adults. It consisted of four  
32  
33 195 multiple choice questions : 1) the type of contract services that family doctors provided for disabled  
34  
35 196 older adults; 2) the top three services that disabled older adults needed most from the perspective of  
36  
37 197 family doctors; 3) the most concerning factors of disabled older adults while family doctors  
38  
39 198 providing medical services; 4) the main factors that affect family doctors to provide contracted  
40  
41 199 services for disabled older adults. Respondents needed to list the top three answers in question 2  
42  
43 200 and question 4. The third part was the workload for home visits by family doctors, to describe the  
44  
45 201 workload of home visits by family doctors, three aspects were taken into consideration: 1) the  
46  
47 202 frequency per year of home visits provided by each family doctor for disabled older adults; 2) the  
48  
49 203 treatment time in hours quantified the time of treatment for each home visit. 3) the workload for  
50  
51 204 home visits by family doctors was calculated by multiplication of the treatment time with the  
52  
53 205 frequency per year. The final part was the performance evaluation of family doctor contract services  
54  
55 206 based on family doctors, which included three multiple choice questions: 1) the cooperation  
56  
57 207 frequency of disabled older adults and their families when family doctors operate home visits  
58  
59 208 service; 2) the importance of family doctors' role in the FDCS for disabled older adults; 3) the extent  
60  
209 to which FDCS meet the medical needs of disabled older adults. To measure the performance



1  
2  
3  
4 210 evaluation of family doctor contract services based on family doctors, we identified the independent  
5  
6 211 was different regions and the dependent variable was cooperation frequency of disabled older adults  
7  
8 212 and their families, importance of family doctors' role and the extent to which FDCS meet the  
9  
10 213 medical needs of disabled older adults.

11  
12 214 The research team has discussed the rationality and appropriateness of each question, and the  
13  
14 215 content validity of the questionnaire was tested by an expert with extensive experience in FDCS and  
15  
16 216 an clinical expert who work in a CHC. After experts' feedback, a pilot study was conducted in a  
17  
18 217 CHC with 40 samples twice within a 2-week interval to check reliability of the questionnaire. The  
19  
20 218 40 samples were same population and they have same characteristics as those used in the present  
21  
22 219 study. The test-retest reliability coefficient after 2 weeks was 0.73.

#### 23 24 220 2.2.2 Data collection

25  
26 221 The inclusion criteria of the questionnaires were as follows: 1) family doctors, 2) contracted with  
27  
28 222 disabled older adults, 3) engaged in the related work for disabled older adults more the 6 months.  
29  
30 223 283 family doctors participated in the questionnaire survey in the 15 selected CHCs. The returned  
31  
32 224 questionnaires with invalid data were to the exclusion of data analysis, and hence final samples of  
33  
34 225 276 were gathered.

#### 35 36 226 2.2.3 Statistical Methods

37  
38 227 Statistical description: Data were recorded into EpiData 3.1 system and processed by SPSS 21.0  
39  
40 228 statistical software. The mean and standard deviation were used to statistically describe the  
41  
42 229 measurement data, and the counting data were presented by composition ratio, frequency, and parity  
43  
44 230 arrangement.

45  
46 231 Data analysis: Frequency and rank were applied to display the quantitative data of family doctors  
47  
48 232 including demographic characteristics, gender, age, regions, education and positional title, rank sum  
49  
50 233 test was used to analyze the content of the performance evaluation of FDCS based on family doctors,  
51  
52 234 in which Wilcoxon rank sum test pointed to for two groups and Kruskal-Wallis test (K-W test) for  
53  
54 235 multiple groups. After K-W test, we used Least Significant Difference method (LSD) to compare  
55  
56 236 pairwise group.

### 57 58 237 2.3 Qualitative phase

#### 59 60 238 2.3.1 Sampling and Interviews



1  
2  
3  
4 239 The sampling strategies applied in this stage were purposive sampling. At the start of this research,  
5  
6 240 purposive sampling was used to selected family doctors who met the following inclusion criteria: 1)  
7  
8 241 family doctors, 2) contracted with disabled older adults, 3) engaged in the related work for disabled  
9  
10 242 older adults at least 5 years. The exclusion criteria was that family doctors were unwilling to  
11  
12 243 participate or not able to cooperate with the research. The research team initially connected with 15  
13  
14 244 managers of CHCs by telephone, email, WeChat to confirm the time, place and the number of family  
15  
16 245 doctors who may accepted interview. Then, the manager of CHC provides a list containing contact  
17  
18 246 information of family doctors who meet the eligibility criteria and their contact information. The  
19  
20 247 research team members contact the intended interviewees and provide a detailed introduction to the  
21  
22 248 research purpose. Finally, 30 family doctors have informed consent and voluntarily participate in  
23  
24 249 the interview [27]. The ethics approval was given by the Medical Ethics Committee of Capital  
25  
26 250 Medical University.

### 27 251 2.3.2 Data collection

28  
29 252 The interview outline formulated based on an extensive review of relevant literature and repeated  
30  
31 253 discussion by panel experts. And two participants were also invited to conduct pre interviews before  
32  
33 254 the formal interview to ensure the integrity of the outline content. The content of the interview  
34  
35 255 outline contained the demographic characteristics of family doctors, the differences of health  
36  
37 256 management between contracted healthy senior citizens and disabled older adults, and the barriers  
38  
39 257 and facilitators of FDACS for disabled older adults. One-to-one, semi-structured in-depth personal  
40  
41 258 interviews were conducted in this study. All the interviewers have received a unified standard  
42  
43 259 training in advance, so as to avoid the induced problems and reduce research subjective biases.  
44  
45 260 Before the interview, the interviewee introduced the research purpose, methods, content and  
46  
47 261 confidentiality principles to the interviewees in detail, and obtained informed consent [28]. During  
48  
49 262 the interview, the interviewee or the research assistant note (Field note) for the main issue and after  
50  
51 263 completing the interview verify the content by them. The notes were used to compare with the  
52  
53 264 verbatim transcription. Due to a verbatim transcript captures every single spoken word in the  
54  
55 265 recording and puts it into text. The data saturation of our research is defined as the point when the  
56  
57 266 interviewees did not show any new content or views in the latest round of interviews [29]. 30 family  
58  
59 267 doctors reached the maximum of data saturation. After the interview, the recorded content will be  
60  
268 transcribed in detail within 24 hours by members of the research group to ensure the authenticity of

1  
2  
3  
4 269 the interview content. The interviewees were anonymized, and family doctors were coded with  
5  
6 270 N1 ~ N30.

### 8 271 **2.3.2 Content Analysis**

9  
10 272 A thematic framework method was employed in the qualitative study. The data are classified and  
11  
12 273 analyzed by identifying themes, labeling data, and extracting core information [30]. With the help  
13  
14 274 of the grounded theory [31,32], the data was divided into discrete parts that represented of raw data  
15  
16 275 and open-coded in order to dig out as many themes as possible [33]. The dominant themes were  
17  
18 276 extracted from the comment that appeared repeatedly. Data reduction was performed manually. We  
19  
20 277 classified the related comments into various categories. In this regard, cooperation and division of  
21  
22 278 labor coexist. Specifically, two coders initially read the transcripts and edited the data into codes,  
23  
24 279 and then reread and identified transcripts and coded them into emerging categories [34]. In the next  
25  
26 280 stage, the codes were later organized into themes and further expanded into broader domains after  
27  
28 281 adequate discussion. Finally, the theme-based variables were determined by reaching a consensus.

### 29 282 **2.4 Patient and public involvement**

30  
31 283 No patients or public were involved in the design, or conduct, or reporting, or dissemination plans  
32  
33 284 of this research.

## 35 285 **3. Results**

### 37 286 **3.1 Quantitative findings**

38  
39 287 The demographic characteristics of 276 family doctors are displayed in Table 1. Males occupied  
40  
41 288 less than half (30.1%) of the participants. The proportion of females is about twice that of males.  
42  
43 289 Approximately 47.1% of family doctors are between 30 and 40 years, and the average age of 276  
44  
45 290 family doctors is  $38.93 \pm 8.63$  years old. There are 93 (33.7%) family doctors from Fengtai  
46  
47 291 District, 69 (25.0%) family doctors from Daxing District, 59 (21.4%) family doctors from Huairou  
48  
49 292 District, and 55 (19.9%) family doctors from Xicheng District. Almost 83.7% of the participants  
50  
51 293 obtained bachelor's or above degree. Only 4 family doctors haven't got any positional title, family  
52  
53 294 doctors with the positional title of "resident" or "attending physician" comprised 30.8% and 48.9%,  
54  
55 295 respectively.

56  
57  
58 **Table 1 Demographic characteristics of family doctors**

---

| Items                                     | Number of surveys (%) |
|-------------------------------------------|-----------------------|
| <b>Gender</b>                             |                       |
| Male                                      | 83 (30.1)             |
| Female                                    | 193 (69.9)            |
| <b>Age</b>                                |                       |
| 20~                                       | 47 (17.0)             |
| 30~                                       | 130 (47.1)            |
| 40~                                       | 78 (28.3)             |
| 50~                                       | 15 (5.4)              |
| 60~                                       | 6 (2.2)               |
| <b>Regions</b>                            |                       |
| Xicheng District                          | 55 (19.9)             |
| Fengtai District                          | 93 (33.7)             |
| Daxing District                           | 69 (25.0)             |
| Huairou District                          | 59 (21.4)             |
| <b>Education</b>                          |                       |
| High school or technical secondary school | 4 (1.4)               |
| Junior college                            | 41 (14.9)             |
| University                                | 177 (64.1)            |
| Postgraduate degree or above              | 54 (19.6)             |
| <b>Positional title</b>                   |                       |
| Chief physician                           | 4 (1.4)               |
| Associate chief physician                 | 48 (17.4)             |
| Attending physician                       | 135 (48.9)            |
| Resident                                  | 85 (30.8)             |
| None                                      | 4 (1.4)               |
| <b>Total</b>                              | <b>276 (100.0)</b>    |

296

297 Table 2 revealed the utilization of FDCS for disabled older adults in Beijing. The contracted services

298 provided for disabled older adults comprise primary care, home visits, medical examination, health  
 299 consultation and education, medication guidance, telephone follow-up, psychological counseling  
 300 and family care. After ranking above services by proportion of person time by month hour, this  
 301 study has shown that primary care is the most common services for disabled older adults, following  
 302 by health consultation and education, and medication examination. According to the situation of  
 303 service needs for disabled older adults, family doctors hold the idea that the medication guidance,  
 304 medical examination and home visits are the top three services which disabled older adults desired  
 305 most. Attitude in the service is the most concerned factors of disabled older adults. There are many  
 306 reasons that exert an influence on family doctors to offer services for disabled older adults, for  
 307 instance, short of hands and intensive work is one of the biggest obstacles for family doctors to  
 308 serve disabled older adults.

309

**Table 2 The utilization of family doctor contract services for disabled older adults**

| Items                                                             | Results                   |      |
|-------------------------------------------------------------------|---------------------------|------|
| <b>Types of contracted services which family doctors provided</b> | Total person-time         | Rank |
| Primary care                                                      | 254                       | 1    |
| Home visits                                                       | 176                       | 6    |
| Medical examination                                               | 222                       | 5    |
| Health consultation and education                                 | 239                       | 2    |
| Medication guidance                                               | 234                       | 3    |
| Telephone follow-up                                               | 233                       | 4    |
| Psychological counseling                                          | 162                       | 7    |
| Family care bed                                                   | 30                        | 8    |
| <b>The most desired services for disabled older adults</b>        | Total points <sup>a</sup> | Rank |
| Primary care                                                      | 255                       | 5    |
| Home visits                                                       | 284                       | 3    |
| Medical examination                                               | 295                       | 2    |
| Health consultation and education                                 | 270                       | 4    |

|                                                                                                            |                           |      |
|------------------------------------------------------------------------------------------------------------|---------------------------|------|
| Medication guidance                                                                                        | 316                       | 1    |
| Telephone follow-up                                                                                        | 84                        | 6    |
| Psychological counseling                                                                                   | 76                        | 7    |
| Family care bed                                                                                            | 74                        | 8    |
| <b>The most concerned factors of disabled older adults while family doctors providing medical services</b> | Total person-time         | Rank |
| Diagnostic level                                                                                           | 224                       | 2    |
| Service attitude                                                                                           | 233                       | 1    |
| Charge standard                                                                                            | 196                       | 3    |
| Drug effectiveness                                                                                         | 159                       | 4    |
| Others                                                                                                     | 9                         | 5    |
| <b>The main reasons that affect family doctors to provide services for disabled older adults</b>           | Total points <sup>b</sup> | Rank |
| Poor compliance of disabled older adults and their families                                                | 200                       | 3    |
| Lack of government policy support                                                                          | 469                       | 2    |
| Short of hands and intensive work                                                                          | 533                       | 1    |
| Unreasonable content of contracted services                                                                | 137                       | 5    |
| More complicated and difficult conditions to look after the disabled older adults                          | 178                       | 4    |
| Additional demands from disabled older adults and their families beyond contracted services                | 75                        | 6    |
| Others                                                                                                     | 1                         | 7    |

310 Note: total points<sup>a</sup>=number of people selected for the first desired service×3+ number of people selected  
 311 for the second desired service×2+ number of people selected for the third desired services×1

312 Total points<sup>b</sup>=number of people selected for the first main reason×3+ number of people selected for the  
 313 second main reason×2+ number of people selected for the third main reason×1

314 Home visits is one of the most desired services for disabled older adults, which is a bridge of  
 315 effective communication between family doctors and disabled older adults. Due to the poor physical  
 316 condition and immobility of disabled older adults, home visits also are the main service content of  
 317 family doctors' work for disabled older adults. Therefore, it is necessary to measure and reflect the

workload for home visits by family doctors when performing contracted services for disabled older adults. As shown in Table 3, approximately 27.2% of family doctors provided home visits services for disabled older adults once a year. 68 (24.6%) family doctors serve disabled older adults at their home once a month. The frequency of home visits provided by family doctors from Fengtai District is the highest, nearly 5.4 times/year. The frequency of home visits in the Huairou district is the lowest, around 2.5 times a year. The treatment time of 139 (50.4%) family doctors is from 0.5h to 1h. The average treatment time for each home visits of 276 family doctors is nearly 1.03 hours. The average treatment time of home visits, during which family doctors from Huairou District spend the most, is around 1.11h. The total yearly workload for home visits provided by family doctors is around 4.33 h. The yearly workload of home visits from Fengtai District is the highest and Huairou District is the lowest, almost 5.72h and 2.78h, respectively.

**Table 3 The workload for home visits by family doctors**

| Items                                | Regions          |                  |                 |                  | Total      |
|--------------------------------------|------------------|------------------|-----------------|------------------|------------|
|                                      | Xicheng District | Fengtai District | Daxing District | Huairou District |            |
| <b>Frequency per year N (%)</b>      |                  |                  |                 |                  |            |
| Once a month                         | 11 (20.0)        | 34 (36.6)        | 17 (24.6)       | 6 (10.2)         | 68 (24.6)  |
| Once per quarter                     | 10 (18.2)        | 19 (20.4)        | 15 (21.7)       | 9 (15.3)         | 53 (19.3)  |
| Once half a year                     | 6 (10.9)         | 4 (4.3)          | 10 (14.5)       | 6 (10.2)         | 26 (9.4)   |
| Once a year                          | 16 (29.1)        | 9 (9.7)          | 21 (30.4)       | 29 (49.2)        | 75 (27.2)  |
| None                                 | 7 (12.7)         | 10 (10.8)        | 2 (2.9)         | 3 (5.1)          | 22 (8.0)   |
| Others <sup>c</sup>                  | 5 (9.1)          | 17 (18.3)        | 4 (5.8)         | 6 (10.2)         | 32 (11.6)  |
| Total                                | 55 (100)         | 93 (100)         | 69 (100)        | 59 (100)         | 276 (100)  |
| Mean                                 | 3.6              | 5.4              | 4.4             | 2.5              | 4.2        |
| (time/year)                          |                  |                  |                 |                  |            |
| <b>Treatment time in Hours N (%)</b> |                  |                  |                 |                  |            |
| 0~                                   | 11 (20.0)        | 16 (17.2)        | 7 (10.1)        | 10 (16.9)        | 44 (15.9)  |
| 0.5~                                 | 32 (58.2)        | 42 (45.2)        | 37 (53.6)       | 28 (47.5)        | 139 (50.4) |
| 1.0~                                 | 1 (1.8)          | 27 (29.0)        | 21 (30.4)       | 13 (22.0)        | 71 (25.7)  |

|                                  |           |          |          |          |           |
|----------------------------------|-----------|----------|----------|----------|-----------|
| 2.0~                             | 10 (18.2) | 5 (5.4)  | 3 (4.3)  | 5 (8.5)  | 14 (5.1)  |
| 3.0~                             | 1 (1.8)   | 3 (3.2)  | 1 (1.4)  | 3 (5.1)  | 8 (2.9)   |
| Total                            | 55 (100)  | 93 (100) | 69 (100) | 59 (100) | 276 (100) |
| Mean (h)                         | 1.03      | 1.06     | 1.04     | 1.11     | 1.03      |
| <b>Yearly workload Hours (h)</b> |           |          |          |          |           |
| Total                            | 3.71      | 5.72     | 4.58     | 2.78     | 4.33      |

329 Note: In accordance with disabled older adults' personalized service needs, sometimes the frequency of  
 330 home visits by family doctors is uncertain, we generalize such case into the "others" category. When  
 331 calculating the family doctors' workload, such section of the data was not included.

332 Generally speaking, family doctors, disabled older adults and their families have a good cooperation,  
 333 133 (48.2%) family doctors indicate that disabled older adults and their families often cooperate  
 334 with them while enjoying FDCS, as displayed in Table 4. Approximately 89.8% of family doctors  
 335 think that the contracted services for disabled older adults take into effect, they believe that they  
 336 have played an important role in the FDCS for disabled older adults. Compared with the other 3  
 337 districts, family doctors from Fengtai district have the highest level of evaluation about contracted  
 338 services, 83 (89.3%) family doctors regard themselves as a vital promoter in providing contracted  
 339 services for disabled older adults. 172 (62.2%) family doctors acknowledge that the contracted  
 340 service they provided can meet the medical needs of disabled older adults, but it is not very high the  
 341 extent to FDCS required to meet the medical needs of disabled older adults. Only 40 (14.4%) family  
 342 doctors think that service satisfaction of disabled older adults has achieved the degree of "more  
 343 satisfactory" or "most satisfactory".

344 There are significant differences among the four districts in the aspects of the importance of family  
 345 doctors' role ( $P < 0.001$ ) and the extent to which FDCS meets the medical needs of disabled older  
 346 adults ( $P = 0.04$ ). Cooperation frequency of disabled older adults and their families among four  
 347 districts show no significant difference ( $P = 0.222$ ).

348 Through difference analysis between urban and rural areas, there is no significant  
 349 difference ( $P = 0.955$ ) in the cooperation frequency of disabled older adults and their families. The  
 350 importance of family doctors' role between urban and rural areas indicates a significant difference ( $P < 0.001$ ).  
 351 To be more specific, family doctors from urban areas believe they play a more important  
 352 role in FDCS for disabled older adults than family doctors from rural areas. By analyzing the extent

353 to which FDCS meets the medical needs of disabled older adults, there is a significant difference  
 354 ( $P=0.025$ ) between urban and rural areas. Rural family doctors hold the belief that their services  
 355 are better than urban family doctors to meet the medical needs of disabled older adults.

**Table 4 The performance evaluation of family doctor contract services based on family doctors**

| Items                                                                          | Regions                       |                               |                              |                               | Total<br>(n=276) |
|--------------------------------------------------------------------------------|-------------------------------|-------------------------------|------------------------------|-------------------------------|------------------|
|                                                                                | Urban Areas(n=148)            |                               | Rural Areas(n=128)           |                               |                  |
|                                                                                | Xicheng<br>District<br>(n=55) | Fengtai<br>District<br>(n=93) | Daxing<br>District<br>(n=69) | Huairou<br>District<br>(n=59) |                  |
| <b>Cooperation frequency of disabled older adults and their families N (%)</b> |                               |                               |                              |                               |                  |
| Always                                                                         | 15 (27.2)                     | 23<br>(24.7)                  | 25 (36.2)                    | 8 (13.6)                      | 71 (25.7)        |
| Usually                                                                        | 8 (14.5)                      | 15<br>(16.1)                  | 5 (7.2)                      | 10 (16.9)                     | 38 (13.8)        |
| Often                                                                          | 24 (43.6)                     | 43<br>(46.2)                  | 33 (47.8)                    | 33 (55.9)                     | 133 (48.2)       |
| Seldom                                                                         | 4 (7.2)                       | 10<br>(10.8)                  | 6 (8.7)                      | 7 (11.9)                      | 27 (9.8)         |
| Never                                                                          | 4 (7.2)                       | 2<br>(2.2)                    | 0 (0)                        | 1 (1.7)                       | 7 (2.5)          |
| Mean Rank <sup>a</sup>                                                         | 126.43                        | 130.83                        | 166.85                       | 128.69                        |                  |
|                                                                                |                               | $\chi^2=4.394, P=0.222$       |                              |                               |                  |
| Mean Rank <sup>b</sup>                                                         | 138.27                        |                               | 138.77                       |                               |                  |
|                                                                                |                               | $\chi^2=0.003, P=0.955$       |                              |                               |                  |
| <b>Importance of family doctors' role N (%)</b>                                |                               |                               |                              |                               |                  |
| Least important                                                                | 5 (9.1)                       | 4 (4.3)                       | 1 (1.4)                      | 3 (5.1)                       | 10 (3.5)         |
| Less important                                                                 | 4 (7.3)                       | 6 (6.5)                       | 2 (2.9)                      | 22 (37.3)                     | 18 (6.5)         |
| Important                                                                      | 12 (21.8)                     | 31                            | 24 (34.8)                    | 28 (47.5)                     | 95 (34.4)        |



|                                                                                       |           |                          |           |           |            |  |
|---------------------------------------------------------------------------------------|-----------|--------------------------|-----------|-----------|------------|--|
|                                                                                       |           | (33.3)                   |           |           |            |  |
| More important                                                                        | 25 (45.5) | 42                       | 28 (40.6) | 6 (10.2)  | 117 (42.4) |  |
|                                                                                       |           | (45.2)                   |           |           |            |  |
| Most important                                                                        | 9 (16.4)  | 10 (10.8)                | 1 (1.4)   | 0 (0)     | 36 (13.0)  |  |
| Mean Rank <sup>a</sup>                                                                | 152.79    | 148.35                   | 142.96    | 76.44     |            |  |
|                                                                                       |           | $\chi^2=45.938, P<0.001$ |           |           |            |  |
| Mean Rank <sup>b</sup>                                                                | 150.00    |                          | 108.83    |           |            |  |
|                                                                                       |           | $\chi^2=21.220, P<0.001$ |           |           |            |  |
| <b>The extent to which FDCS meet the medical needs of disabled older adults N (%)</b> |           |                          |           |           |            |  |
| Least satisfactory                                                                    | 12 (21.8) | 7 (7.5)                  | 5 (7.2)   | 6 (10.2)  | 30 (10.9)  |  |
| Less satisfactory                                                                     | 12 (21.8) | 32 (34.4)                | 11 (15.9) | 19 (32.2) | 74 (26.8)  |  |
| Satisfactory                                                                          | 23 (41.8) | 46 (49.5)                | 34 (49.3) | 29 (49.2) | 132 (47.8) |  |
| More satisfactory                                                                     | 8 (14.6)  | 7 (7.5)                  | 16 (3.2)  | 5 (8.5)   | 36 (13.0)  |  |
| Most satisfactory                                                                     | 0 (0)     | 1 (1.1)                  | 3 (4.3)   | 0 (0)     | 4 (1.4)    |  |
| Mean Rank <sup>a</sup>                                                                | 126.43    | 130.83                   | 166.85    | 128.69    |            |  |
|                                                                                       |           | $\chi^2=13.495, P=0.004$ |           |           |            |  |
| Mean Rank <sup>b</sup>                                                                | 129.20    |                          | 149.26    |           |            |  |
|                                                                                       |           | $\chi^2=4.996, P=0.025$  |           |           |            |  |

Note: a= difference analysis among four districts (K-W test),\*significant value<0.05

b=difference analysis between urban and rural areas (K-W test),\*significant value<0.05

358

### 3.2 Qualitative findings

8 (26.3%) male and 22 (73.3%) female family doctor participates in the interview and provide demographic characteristics information displayed in Table 5. 17 (56.7%) family doctors are aged between 30 and 40 years,with an average age of 30 family doctors is  $38.33 \pm 6.00$  years old for the first 30 family doctors. There are 9 (30.0%) family doctors from Xicheng District, which accounts for the largest number of family doctors. Most of the interviewees (93.3%) had a bachelor's degree or higher.

366

**Table 5 Demographic characteristics of family doctors**

| Items                        | Number of interviewees (%) |
|------------------------------|----------------------------|
| <b>Gender</b>                |                            |
| Male                         | 8 (26.3)                   |
| Female                       | 22 (73.7)                  |
| <b>Age</b>                   |                            |
| 20~                          | 1 (3.3)                    |
| 30~                          | 17 (56.7)                  |
| 40~                          | 11 (36.7)                  |
| 50~                          | 1 (3.3)                    |
| <b>Regions</b>               |                            |
| Xicheng District             | 9 (30.0)                   |
| Fengtai District             | 8 (26.7)                   |
| Daxing District              | 8 (26.7)                   |
| Huairou District             | 5 (16.6)                   |
| <b>Education</b>             |                            |
| Junior college               | 2 (6.7)                    |
| University                   | 22 (73.3)                  |
| Postgraduate degree or above | 6 (20.0)                   |
| <b>Total</b>                 | <b>30 (100.0)</b>          |

367

368 The information from this interview can be distilled into three themes utilizing the thematic  
 369 framework methodologies as follows:

370 (i) The differences in health management between contracted healthy senior citizens and disabled  
 371 older adults;

372 (ii) The facilitators of FDCS in caring for disabled older adults.

373 (iii) The barriers of FDCS in caring for disabled older adults.

374 After identifying the meaning units form themes, this study has coded associated sub-themes related  
 375 to three themes, the analysis process of family doctors from the interviews as displayed in  
 376 Supplemental Table 1.

377

378 As shown in Supplemental Table 1, there are many differences of health management between  
379 contracted healthy senior citizens and disabled older adults. The service content of FDCS should be  
380 tailored to the specific needs of disabled older adults because they have greater health demands than  
381 contracted with healthy old people. In addition, because of the complicated physical conditions of  
382 older adults with disabilities, providing FDCS is significantly riskier and requires more medical and  
383 human resources on the part of family doctors. Additionally, family doctors should pay closer  
384 attention to their physical and mental health and give them more humanistic care, because the  
385 majority of old people with disabilities have little interaction with other people.

386 In the process of providing contracted services for disabled older adults, family doctors are  
387 confronted with many facilitators and barriers. On the one hand, through FDCS, family doctors  
388 regularly interact with disabled older adults and their families, improve their health knowledge,  
389 directly provide them with some counsel on nutrition and medication use, which can build trust  
390 between the doctor and patient. Meanwhile, FDCS has significantly reduced the strain on  
391 neighborhood hospitals and eased the financial burden on older people with disabilities and their  
392 families. On the other hand, there are many barriers hindering the development of FDCS. The  
393 majority of family doctors have acknowledged that labor scarcity is a problem. They often work  
394 intensively and sometimes even sacrifice their rest time to provide services for disabled older adults.  
395 However, because there are no supervision or incentive programs in place for family doctors, their  
396 losses and gains are not directly proportional. Besides, some problems always haunt family doctors,  
397 such as high risks in the process of home visits, lack of continuity in FDCS, poor compliance of  
398 disabled older adults and their families, and insufficient publicity of FDCS, etc.

#### 399 **4. Discussion**

##### 400 **The performance of FDCS for disabled older adults in Beijing**

401 The development of primary care is inseparable from the escort of family doctors. At present, over  
402 50 countries and regions have implemented FDCS, which are vital for dealing with the burden of  
403 those countries' health care system [12]. According to the results, 248 (89.8%) family doctors  
404 regard themselves as an important role in providing contracted services for disabled older adults.  
405 Consistent with our results, Family doctors play a more pivotal role in the health security of  
406 contracted resident[35]. In addition to offering basic medical services, family doctors often provide

1  
2  
3  
4 407 a various services to meet the health needs of disabled older adults in Beijing, such as health  
5  
6 408 promotion, telephone follow-up, home visits and family care etc. From the view of family doctors,  
7  
8 409 medication guidance, physical examination and home visits were the top three services that disabled  
9  
10 410 older adults desired most. However, relevant research evidence shows that with the increasing  
11  
12 411 demand of medical care and the tightening of government public expenditure, the unmet needs  
13  
14 412 among disabled older adults are also increasing [36,37]. This study has found FDCS 'satisfaction  
15  
16 413 with the medical needs of disabled older adults is not high. Only 40 (14.4%) family doctors think  
17  
18 414 that service satisfaction of disabled older adults has achieved the degree of "more satisfactory" or  
19  
20 415 "most satisfactory".

#### 21 416 **The roles of FDCS for disabled older adults in Beijing**

22  
23 417 The disabled older adults have higher health demands and family doctors should invest more time  
24  
25 418 and energy to look after them. Besides fulfilling the six functions of gatekeeper in the primary care  
26  
27 419 system, our study has identified five unique roles of family doctors in the process of looking after  
28  
29 420 disabled older adults. 1) "Psychological consultant", which refers to contacting with disabled older  
30  
31 421 adults and their families to better understand their physical and psychological conditions and to  
32  
33 422 provide more empathetic treatment. 2) "Rehabilitation physiotherapist", which means providing  
34  
35 423 rehabilitation treatment to meet the rehabilitative needs of disabled older adults. 3) "Health  
36  
37 424 Educator", which entails educating disabled older adults and their families about health issues as  
38  
39 425 well as offering medical advice and health counseling to disabled older adults. 4) "Health Manager",  
40  
41 426 requires to educate disabled older adults and their families about health issues as well as offer  
42  
43 427 medical advice and health counseling to disabled olde adults. 5) "Family health guardian", which  
44  
45 428 means offering home visits and family care bed services, supporting the family care of disabled  
46  
47 429 older adults, and protecting the health of disabled older adults in all aspects.

#### 48 430 **The differences of FDCS for disabled older adults between urban and rural Beijing**

49  
50 431 There are many factors that exert a negative influence on the utilization of FDCS for disabled older  
51  
52 432 adults. Due to lack of manpower, family doctors have heave work tasks and high work intensity in  
53  
54 433 the process of caring for disabled older adults, which is one of the biggest difficulties impeded the  
55  
56 434 utilization of FDCS. In this study, there is a significant difference( $P=0.025$ ) in satisfaction of FDCS  
57  
58 435 between urban and rural areas, the rural medical staff are more satisfied with the provision of FDCS  
59  
60 436 for the disabled older adults than urban. Although there is more demand for medical services in

1  
2  
3  
4 437 urban areas, family doctors in these areas often have more medical resources. One possible  
5  
6 438 explanation to describe this phenomenon is that disabled older adults living in rural areas may have  
7  
8 439 relatively simple health needs compared to urban areas [38]. So, the contracted services provided  
9  
10 440 by family doctors may be more likely to meet the needs of rural disabled older adults. However, the  
11  
12 441 role of FDCS for disabled older adults from urban is more important than those from rural areas. A  
13  
14 442 higher frequency of home visits was more likely accomplished in urban Beijing, which is opposite  
15  
16 443 to Maik Pochert's findings of Germany[39]. Above different results may be caused by the different  
17  
18 444 patient population and level of medical resources between two countries.

### 19 445 **The barriers of FDCS for disabled older adults in Beijing**

20  
21 446 However, barriers have occurred on family doctors when they provide contract services for disabled  
22  
23 447 older adults. In their interviews, the majority of family doctors described how difficult it was to deal  
24  
25 448 with issues such a lack of personnel, the dangers associated with house visits, the discontinuity of  
26  
27 449 the FDCS, and inadequate promotion of the FDCS, among others. Our study has classified these  
28  
29 450 barriers into two categories, the exterior barriers and interior ones. The outer barriers mainly focus  
30  
31 451 on three aspects: 1) High risks involved in home visits. Home visits entail family doctors leaving  
32  
33 452 their usual practice space and going to the homes of disabled older adults. Many family doctors  
34  
35 453 expressed concern that accidents might happen while going to their home or while giving them with  
36  
37 454 medical care. In China, there is currently no insurance covering medical mishaps involving house  
38  
39 455 visits; should this occur, family doctors would suffer significant financial losses and legal issues. 2)  
40  
41 456 Absence of supervisory and incentive mechanism. In some developed countries, such as the U.S.,  
42  
43 457 Canada, French, family doctors' personal income is directly related to their own performance due  
44  
45 458 to fair market competition and free family doctors signing model. However, most FDCS in Beijing  
46  
47 459 follow the Pay-for-Service model, which means the government sets the content and fees of FDCS,  
48  
49 460 and family doctors only can provide these fixed services for disabled older adults. It is inevitable  
50  
51 461 that disabled older adults will generate additional service needs, and family doctors will complain  
52  
53 462 about the incentive mechanism. Family doctors in the interviews expressed that their efforts were  
54  
55 463 not directly proportional to their income, and most of the services were driven by their  
56  
57 464 responsibilities. 3) Lack of government policy support and medical resources input. Shortage of  
58  
59 465 personnel is a major problem which faced by family doctors. It reflects that the current supply of  
60  
466 medical human resources are disconnected from the actual medical needs of disabled older adults.

1  
2  
3  
4 467 Moreover, there are obvious differences between urban and rural areas in terms of medical resource  
5  
6 468 input. Family doctors in rural areas said that their CHCs lacks basic inspection facilities, which  
7  
8 469 brings a lot of inconveniences to conducting FDCS.  
9  
10 470 The interior barriers are mainly about three aspects:1)Lack of time and effort. Family doctors must  
11  
12 471 expend more effort and time serving disabled older adults towing to their complex conditions and  
13  
14 472 varied medical service needs. Many family doctors mentioned that they needed to sacrifice their  
15  
16 473 personal time to help disabled older adults, which brought a serious pressure on their bodies and  
17  
18 474 minds. 2) Lack of capacity. According to our results, only 40 (14.4%) family doctors think that  
19  
20 475 disabled older adults have been very satisfied with their services. Additionally, 8 family doctors  
21  
22 476 stated in the interviews that they were unable to handle the issue when disabled older adults and  
23  
24 477 their families demanded extra services that were outside the purview of FDCS, which resulted in  
25  
26 478 low compliance from the old adults with disabilities and their families. 3) Undertaking extra non-  
27  
28 479 professional responsibilities. Most family members of disabled older adults think that since signing  
29  
30 480 up with family doctors, family doctors should take more responsibility for disabled older adults.  
31  
32 481 Sometimes family doctors feel like they are being filial to disabled older adults. The phenomenon  
33  
34 482 of shifting care responsibilities will exacerbate the bad relationship between doctors and patients.  
35  
36 483 At present, there are few studies figuring out the relationship between the barriers and the roles of  
37  
38 484 functional medical services in the FDCS disabled older adults. Based on our findings, the  
39  
40 485 researchers drew a schematic diagram to describe the relationships between barriers and the roles  
41  
42 486 of family doctors, as shown in Figure 2.

43 487

#### 44 488 **The facilitators of FDCS for disabled older adults in Beijing**

45  
46 489 By comparing with existing literature, our research finds that the successful implementation of  
47  
48 490 FDCS in other countries has the following commonalities:1) The development of FDCS is based on  
49  
50 491 community health institutions or platforms, such as Patient-centered Medical Home (PCMH) in US  
51  
52 492 [40,41], the family doctor-and-nurse offices in Cuba [42], and family doctors' community private  
53  
54 493 clinic in UK, Germany, Netherlands, French and Canada [43~47]. Although the service model and  
55  
56 494 service content of FDCS are different from the above countries, their health institutions are all over  
57  
58 495 the country, forming the backbone of primary health care. 2) Education and training of family  
59  
60 496 doctors is an important prerequisite to ensure the implementation of FDCS. The education and

1  
2  
3  
4 497 evaluation of family doctors in US emphasis on lifelong learning and evaluation, which included  
5  
6 498 three consecutive stages: pre-medical school, medical school and continuing education [48]. 3) A  
7  
8 499 reasonable and effective incentive mechanism of family doctors is a necessary guarantee for family  
9  
10 500 doctors to insist on FDCS, which is closely related to the government's policy support and the  
11  
12 501 allocation of medical resources [49]. Therefore, in order to solve the problems in FDCS for disabled  
13  
14 502 older adults and improve the quality of FDCS, first of all, the government should improve policy  
15  
16 503 formulation ,support of FDCS, and establish an effective supervision and incentive mechanism to  
17  
18 504 ensure that the efforts of family doctors is directly proportional to their income. Meanwhile, the  
19  
20 505 government should strengthen the training and education of family doctors to solve the lack of hands,  
21  
22 506 and improve the laws and regulations on the risk of family doctors to ensure their security during  
23  
24 507 home visits. Besides, the government should promote the policy publicity of FDCS to raise the  
25  
26 508 social status of family doctors, and to reduce misunderstanding about family doctors. Second, as far  
27  
28 509 as family doctors are concerned, some standards they must be observed in the process of FDCS.  
29  
30 510 Family doctors should consciously fulfill the spirit of the contract, improve the frequency of  
31  
32 511 communication between doctors and patients, pay more attention to their physical and psychological  
33  
34 512 conditions, and establish a mutual trust relationship with disabled older adults and their families.  
35  
36 513 Meanwhile, family doctors should refuse the exorbitant demands of disabled older adults and resist  
37  
38 514 financial or other temptations to agree to their requests which go beyond the scope of contracted  
39  
40 515 services. Third, disabled older adults and their families should understand and cooperate with family  
41  
42 516 doctors [19]. Families of disabled older adults should assume responsibility for them, devote more  
43  
44 517 time and effort to caring for them, and take the initiative to inform family doctors of disabled older  
45  
46 518 adults's most recent physical and mental conditions. By doing this, family doctors will be better able  
47  
48 519 to identify disabled older adults' health risks and lessen the chance of secondary injury.

## 49 520 5. Strengths and Limitations

50  
51 521 Our study has investigated the current status of FDCS of disabled older adults, identified five  
52  
53 522 distinct roles of family doctors who have contracted with disabled older adults, and explored the  
54  
55 523 relationships between the barriers and roles of family doctors in the process of FDCS. Firstly, from  
56  
57 524 the new perspective of family doctors, this study has examined many aspects of the current FDCS  
58  
59 525 of disabled older adults in Beijing, such as service content, the workload of family doctors, and  
60  
526 service satisfaction, and enriched the international discussion of similar topics. Secondly, this study



1  
2  
3  
4 527 has discovered the interests and demands of family doctors as well as potential obstacles and  
5  
6 528 enablers in the implementation of family doctor contract services for disabled older adults. Finally,  
7  
8 529 it is the first time to identify the roles of family doctors in family doctor contract service of disabled  
9  
10 530 older adults in Beijing, and manifest the relationships between the roles of family doctors and the  
11  
12 531 barriers.

13 532 However, our research inevitably has some shortcomings, which can be roughly divided into two  
14  
15 533 aspects. First, this study were collected data from one sector of healthcare provider does not cover  
16  
17 534 the perspective of all stakeholders in FDCS. Second, the representativeness of our study was limited  
18  
19 535 since only a sample of family doctors in 4 districts chosen from 16 in Beijing were interviewed and  
20  
21 536 studied. But we believe it is worth considering conducting similar studies in smaller cities across  
22  
23 537 the China in the future and putting more related subjects into our research.

## 24 25 538 6. Conclusion

26  
27 539 There is no doubt that family doctors play an important role in the FDCS for disabled older adults.  
28  
29 540 Compared with contracted healthy senior citizens, disabled older adults need more accessible,  
30  
31 541 comprehensive and humanistic care. Therefore, family doctors should devote more time and effort  
32  
33 542 to caring for them. This study has demonstrated the relationships between barriers, roles played by  
34  
35 543 family doctors, and the process of FDCS and put forward corresponding suggestions to improve the  
36  
37 544 quality of FDCS. Future research must concentrate on removing the current FDCS restrictions to  
38  
39 545 improve the health of disabled older adults and their well-being..

40  
41 546

42  
43 547

44  
45 548

46  
47 549

48  
49 550

50  
51 551

## 52 552 Acknowledgements

53  
54 553 The author would like to thank all the participants, experts and researchers who participated in this  
55  
56 554 study.

57  
58 555

59  
60 556 Authors' Contributions



1  
2  
3  
4 557 ZZ, ZR, and PY contributed to the conception and design of the research. ZZ, ZR, ZS, ZJY and PY  
5  
6 558 conducted on-site research and data gathering. JQ, ZJJ, LH and CJ analyzed the data. ZZ, ZR, ZS  
7  
8 559 and PY drafted the manuscript; and other authors revised it. All authors read and approved the final  
9  
10 560 manuscript. All authors agreed to be accountable for all aspects of the work.

11 561

#### 12 562 Funding

13  
14  
15 563 This study was funded by Beijing Social Science Foundation Project (Funding Number  
16  
17 564 19JDSRB008). The funding organization had no further role in the study design, data collection and  
18  
19 565 analysis, interpretation of the data, writing the paper and the decision to submit the paper for  
20  
21 566 publication.

22 567

#### 23 568 Ethics Declarations

24  
25  
26  
27 569 All included participants gave their oral and written informed consent and all experiments were  
28  
29 570 performed in accordance with relevant guidelines and regulations. The study was approved by  
30  
31 571 Medical Ethics Committee of Capital Medical University, Beijing, China. (Reference number  
32  
33 572 Z2021SY027).

34 573

#### 35 574 Competing Interests

36  
37  
38  
39 575 The authors declare that they have no competing interest.

40 576

#### 41 577 Consent for Publication

42  
43  
44 578 Not applicable.

45 579

46 580

#### 47 581 Availability of Data and Materials

48  
49  
50  
51  
52 582 Transcripts will not be shared for online access to protect the anonymity of the participants. Readers  
53  
54 583 who wish to gain access to the data can write to the corresponding author.

55 584

#### 56 585 Abbreviations

57  
58  
59  
60 586 FDCS Family Doctor Contract Services

1  
2  
3  
4 587 CHC Community Health Service Center

5  
6 588

7  
8 589 Figure legends

9  
10 590 Figure 1 Process of the mixed methods research. It intuitively reflects the purpose of our research,  
11  
12 591 the main content and methods of each stage.

13  
14 592 Figure 2 Schematic diagram of the relationships between the roles of family doctors and the  
15  
16 593 barriers. It shows the relationship of six unique roles of family doctors in the contracted services for  
17  
18 594 disabled older adults, three interior barriers and three outer barriers. Interior barriers mainly arise  
19  
20 595 from the family doctors themselves, which directly affects the roles of family doctors. Outer barriers  
21  
22 596 mainly arise from the environment around the family doctors, includes policy environment of FDOS,  
23  
24 597 working environment, which indirectly affects the roles of family doctors.

25  
26 598  
27  
28  
29  
30  
31  
32  
33  
34  
35  
36  
37  
38  
39  
40  
41  
42  
43  
44  
45  
46  
47  
48  
49  
50  
51  
52  
53  
54  
55  
56  
57  
58  
59  
60

## References

- 599
- 600 [1] World Health Organization. Draft WHO global disability action plan 2014-2021: Better health  
601 for all people with disabilities[Z]. Geneva: World Health Organization, 2014.
- 602
- 603 [2] Jiang, H., et al., Study on the Measurement and Influencing Factors of Care Service Demand  
604 of Disabled Elderly in Urban and Rural China. *International journal of environmental research  
605 and public health*, 2022. 19(17): p. 11112.
- 606 [3] Fang EF, Xie C, Schenkel JA, et al. A research agenda for ageing in China in the 21st century  
607 (2nd edition): Focusing on basic and translational research, long-term care, policy and social  
608 networks. *Ageing Res Rev.* 2020;64:101174. doi:10.1016/j.arr.2020.101174.
- 609 [4] China Daily, China releases 5-year plan for elderly care services[OB].[2022-02]/[2023.03]  
610 <http://www.chinadaily.com.cn/a/202202/21/WS62139382a310cdd39bc87feb.html>
- 611 [5] Nieboer A., Koolman X., Stolk E. Preferences for long-term care services: Willingness to pay  
612 estimates derived from a discrete choice experiment. *Soc. Sci. Med.* 2010;9:1317–1325. doi:  
613 10.1016/j.socscimed.2009.12.027.
- 614 [6] Hu H., Si Y., Li B. Decomposing Inequality in long-term care Need Among Older Adults with  
615 Chronic Diseases in China: A Life Course Perspective. *Int. J. Environ. Res. Public Health.*  
616 2020;7:2559. doi: 10.3390/ijerph17072559.
- 617 [7] Si M., Kong F., Wu J., Li S. Review on the demand of long-term care of the elderly and its  
618 influencing factors. *Chin. Health Serv. Manag.* 2018;2:157–160.
- 619 [8] Liu Y., Feng Y., Wang Y. long-term care needs and influencing factors of the disabled elderly.  
620 *Chin. J. Gerontol.* 2016;6:1482–1484.
- 621 [9] Notice of the General Office of the NHC on signing up family doctors for services in 2019  
622 [http://www.gov.cn/xinwen/2019-04/26/content\\_5386470.htm](http://www.gov.cn/xinwen/2019-04/26/content_5386470.htm).
- 623 [10] Wang K, Ke Y, Sankaran S, Xia B. Problems in the home and community-based long-term  
624 care for the elderly in China: A content analysis of news coverage. *Int J Health Plann Manage.*  
625 2021;36(5):1727-1741. doi:10.1002/hpm.3255.
- 626 [11] Yuan, Shasha et al. “Facilitators and barriers to implement the family doctor contracting  
627 services in China: findings from a qualitative study.” *BMJ open* vol. 9,10 e032444. 8 Oct. 2019,  
628 doi:10.1136/bmjopen-2019-032444.

- 1  
2  
3 629 [12] The developing family doctor system: evidence from the progress of the family doctor signing  
4 630 service from a longitudinal survey (2013–2016) in Pudong New Area, Shanghai.
- 5  
6  
7 631 [13] Streit S, Verschoor M, Rodondi N, et al. Variation in GP decisions on antihypertensive  
8 632 treatment in oldest-old and frail individuals across 29 countries. *BMC Geriatr.* 2017;17(1):93.  
9 633 Published 2017 Apr 20. doi:10.1186/s12877-017-0486-4.
- 10  
11  
12  
13 634 [14] Yellamaty V, Ball L, Crossland L, Jackson C. General practitioners with special interests: An  
14 635 integrative review of their role, impact and potential for the future. *Aust J Gen Pract.*  
15 636 2019;48(9):639-643. doi:10.31128/AJGP-02-19-4849.
- 16  
17  
18 637 [15] Lee JQ, Loke W, Ng QX. The Role of Family Physicians in a Pandemic: A Blueprint.  
19 638 *Healthcare (Basel).* 2020;8(3):198. Published 2020 Jul 5. doi:10.3390/healthcare8030198.
- 20  
21  
22  
23 639 [16] China Economic Weekly. The number of contracting residents in Beijing reached 8.016 million,  
24 640 what healthy services can family doctors bring to the community residents?[OB].May. 2021,  
25 641 <https://baijiahao.baidu.com/s?id=1700966914524606668&wfr=spider&for=pc>.
- 26  
27  
28 642 [17] Yin D, Zhang J, Wang Z, Zhai C, Shi Y, Xie F, et al.. Delivery status of contractual services  
29 643 from family doctors in China and advances in the related studies. *Chin J Gen Prac.* (2018)  
30 644 21:753–60.
- 31  
32  
33 645 [18] The developing family doctor system: evidence from the progress of the family doctor signing  
34 646 service from a longitudinal survey (2013–2016) in Pudong New Area, Shanghai
- 35  
36  
37 647 [19] Zhang R, Zhang Z, Peng Y, Zhai S, Zhou J, Chen J. The multi-subject cooperation mechanism  
38 648 of home care for the disabled elderly in Beijing: a qualitative research. *BMC Prim Care.*  
39 649 2022;23(1):186. Published 2022 Jul 26. doi:10.1186/s12875-022-01777-w.
- 40  
41  
42  
43 650 [20] Aung, W. H., Kitreerawutiwong, N., Keeratisiroj, O., & Jariya, W. (2022). Health Service  
44 651 Readiness, Availability, and Utilization of Primary Health Care Facilities for Non-  
45 652 Communicable Diseases in Shan State, Myanmar. *Iranian journal of public health*, 51(6),  
46 653 1303–1312. <https://doi.org/10.18502/ijph.v51i6.9675>
- 47  
48  
49 654 [21] Wu, Dan et al. “Health system reforms, violence against doctors and job satisfaction in the  
50 655 medical profession: a cross-sectional survey in Zhejiang Province, Eastern China.” *BMJ*  
51 656 open vol. 4,12 e006431. 31 Dec. 2014, doi:10.1136/bmjopen-2014-006431.
- 52  
53  
54  
55 657 [22] Zhang, Tao, and Xiaohe Wang. “Association of Continuity of General Practitioner Care with

- 1  
2  
3 658 Utilisation of General Practitioner and Specialist Services in China: A Mixed-Method Study.”  
4  
5 659 Healthcare (Basel, Switzerland) vol. 9,9 1206. 13 Sep. 2021, doi:10.3390/healthcare9091206.  
6  
7 660 [23] Lilford RJ, Chilton PJ, Hemming K, Girling AJ, Taylor CA, Barach P. Evaluating policy and  
8  
9 661 service interventions: framework to guide selection and interpretation of study end points. *BMJ*.  
10  
11 662 2010;341:c4413. Published 2010 Aug 27. doi:10.1136/bmj.c4413.  
12  
13 663 [24] Vedel I, Kaur N, Hong QN, et al. Why and how to use mixed methods in primary health care  
14  
15 664 research. *Fam Pract*. 2019;36(3):365-368. doi:10.1093/fampra/cmy127.  
16  
17 665 [25] Prasitanarapun, R., & Kitreerawutiwong, N. (2023). The development of an instrument to  
18  
19 666 measure interprofessional collaboration competency for primary care teams in the district  
20  
21 667 health system of health region 2, Thailand. *BMC primary care*, 24(1), 55.  
22  
23 668 <https://doi.org/10.1186/s12875-023-02013-9>  
24  
25 669 [26] Gagliardi AR, Marshall C, Huckson S, James R, Moore V. Developing a checklist for guideline  
26  
27 670 implementation planning: review and synthesis of guideline development and implementation  
28  
29 671 advice. *Implement Sci*. 2015;10:19. Published 2015 Feb 12. doi:10.1186/s13012-015-0205-5.  
30  
31 672 [27] Jin Y, Li Z, Han F, et al. Barriers and enablers for the implementation of clinical practice  
32  
33 673 guidelines in China: a mixed-method study. *BMJ Open*. 2019;9(9):e026328. Published 2019  
34  
35 674 Sep 13. doi:10.1136/bmjopen-2018-026328.  
36  
37  
38 675 [28] Denny, Elaine, and Annalise Weckesser. “Qualitative research: what it is and what it is not:  
39  
40 676 Study design: qualitative research.” *BJOG : an international journal of obstetrics and*  
41  
42 677 *gynaecology* vol. 126,3 (2019): 369. doi:10.1111/1471-0528.15198.  
43  
44 678 [29] Guest G, Namey E, Chen M. A simple method to assess and report thematic saturation in  
45  
46 679 qualitative research. *PLoS ONE*. (2020) 15:e0232076. 10.1371/journal.pone.0232076.  
47  
48 680 [30] Boeije H. *Analysis in qualitative research*. London: Sage publications; 2009.  
49  
50 681 [31] de la Espriella R, Gómez Restrepo C. Grounded theory. *Teoría fundamentada. Rev Colomb*  
51  
52 682 *Psiquiatr (Engl Ed)*. 2020;49(2):127-133. doi:10.1016/j.rcp.2018.08.002.  
53  
54 683 [32] Chapman AL, Hadfield M, Chapman CJ. Qualitative research in healthcare: an introduction to  
55  
56 684 grounded theory using thematic analysis. *J R Coll Physicians Edinb*. 2015;45(3):201-205.  
57  
58 685 doi:10.4997/JRCPE.2015.305.  
59  
60 686 [33] Rat C, Meunier-Beillard N, Moulard S, Denis F. Caregiver Representations of Therapeutic

- 1  
2  
3  
4 687 Patient Education Programmes for People with Schizophrenia: A Qualitative Study. *Healthcare*  
5 688 (Basel). 2022 Aug 29;10(9):1644. doi: 10.3390/healthcare10091644. PMID: 36141256;  
6  
7 689 PMCID: PMC9498836.
- 9 690 [34] Foley G, Timonen V. Using Grounded Theory Method to Capture and Analyze Health Care  
11 691 Experiences. *Health Serv Res*. 2015 Aug;50(4):1195-210. doi: 10.1111/1475-6773.12275.  
12 692 Epub 2014 Dec 18. PMID: 25523315; PMCID: PMC4545354.
- 15 693 [35] Cardoso CS, Prazeres F, Xavier B, Gomes B. Family Physicians' Perspectives on Their Role  
16 694 in Palliative Care: A Double Focus Group in Portugal. *Int J Environ Res Public Health*.  
17 695 2021;18(14):7282. Published 2021 Jul 7. doi:10.3390/ijerph18147282.
- 21 696 [36] Iparraguirre J.L. Reductions in local government spending on community-based social care  
22 697 and unmet social care needs of older people in England. *J. Econ. Ageing*. 2017;100126. doi:  
23 698 10.1016/j.jeoa.2017.07.001.
- 27 699 [37] Means R. A brave new world of personalized care? Historical perspectives on social care and  
28 700 older people in England. *Soc. Policy Adm*. 2012;46:302–320. doi: 10.1111/j.1467-  
29 701 9515.2011.00807.x.
- 33 702 [38] Chen L, Guo W, Perez C. The Effect of Aging Attitudes on the Quality of Life of Older Adults  
34 703 in China. *Res Aging*. 2021;43(2):96-106. doi:10.1177/0164027520948192.
- 37 704 [39] Pochert M, Voigt K, Bortz M, Sattler A, Schübel J, Bergmann A. The workload for home visits  
38 705 by German family practitioners: an analysis of regional variation in a cross-sectional  
39 706 study. *BMC Fam Pract*. 2019;20(1):3. Published 2019 Jan 4. doi:10.1186/s12875-018-0891-6.
- 43 707 [40] Shi L, Lee DC, Chung M, Liang H, Lock D, Sripipatana A. Patient-Centered Medical Home  
44 708 Recognition and Clinical Performance in U.S. Community Health Centers. *Health Serv Res*.  
45 709 2017 Jun;52(3):984-1004. doi: 10.1111/1475-6773.12523. Epub 2016 Jun 20. PMID:  
46 710 27324440; PMCID: PMC5441497.
- 51 711 [41] Ortiz MR. Patient-Centered Medical (Health) Home: Nursing Theory-Guided Policy  
52 712 Perspectives. *Nurs Sci Q*. 2020;33(1):91-96. doi:10.1177/0894318419881795.
- 54 713 [42] Gorry C. Cuba's Family Doctor-and-Nurse Teams: A Day in the Life. *MEDICC Rev*.  
55 714 2017;19(1):6-9. doi:10.37757/MR2017.V19.N1.2

- 1  
2  
3  
4 715 [43] Vallejo-Torres L, Morris S. Primary care supply and quality of care in England. *Eur J Health*  
5 716 *Econ.* 2018 May;19(4):499-519. doi: 10.1007/s10198-017-0898-2. Epub 2017 May 30. PMID:  
6 717 28560521; PMCID: PMC5913392.
- 7  
8  
9 718 [44] Buhtz C, Paulicke D, Schwarz K, Jahn P, Stoevesandt D, Frese T. Receptiveness Of GPs In  
10 719 The South Of Saxony-Anhalt, Germany To Obtaining Training On Technical Assistance  
11 720 Systems For Caregiving: A Cross-Sectional Study. *Clin Interv Aging.* 2019 Sep 17;14:1649-  
12 721 1656. doi: 10.2147/CIA.S218367. PMID: 31571844; PMCID: PMC6756162.
- 13  
14  
15 722 [45] Van der Heiden W, Lacroix J, Moll van Charante EP, Beune E. GPs' views on the  
16 723 implementation of combined lifestyle interventions in primary care in the Netherlands: a  
17 724 qualitative study. *BMJ Open.* 2022 Feb 4;12(2):e056451. doi: 10.1136/bmjopen-2021-056451.  
18 725 PMID: 35121605; PMCID: PMC8819797.
- 19  
20  
21 726 [46] Kroneman M, Meeus P, Kringos DS, Groot W, van der Zee J. International developments in  
22 727 revenues and incomes of general practitioners from 2000 to 2010. *BMC Health Serv Res.* 2013  
23 728 Oct 24;13:436. doi: 10.1186/1472-6963-13-436. PMID: 24152337; PMCID: PMC4015771.
- 24  
25  
26 729 [47] Suter E, Mallinson S, Misfeldt R, Boakye O, Nasmith L, Wong ST. Advancing team-based  
27 730 primary health care: a comparative analysis of policies in western Canada. *BMC Health Serv*  
28 731 *Res.* 2017 Jul 17;17(1):493. doi: 10.1186/s12913-017-2439-1. PMID: 28716120; PMCID:  
29 732 PMC5512982.
- 30  
31  
32 733 [48] Xiao Y, Song Y, Du N, Li Y. Challenges in establishing a strong family medicine system in  
33 734 China. *Fam Pract.* 2021;38(6):850-851. doi:10.1093/fampra/cmab059.
- 34  
35  
36 735 [49] Bayati M, Rashidian A, Sarikhani Y, Lohivash S. Income inequality among general  
37 736 practitioners in Iran: a decomposition approach. *BMC Health Serv Res.* 2019;19(1):620.  
38 737 Published 2019 Sep 2. doi:10.1186/s12913-019-4473-7.

738

1  
2  
3  
4  
5  
6  
7  
8  
9  
10  
11  
12  
13  
14  
15  
16  
17  
18  
19  
20  
21  
22  
23  
24  
25  
26  
27  
28  
29  
30  
31  
32  
33  
34  
35  
36  
37  
38  
39  
40  
41  
42  
43  
44  
45  
46  
47  
48  
49  
50  
51  
52  
53  
54  
55  
56  
57  
58  
59  
60

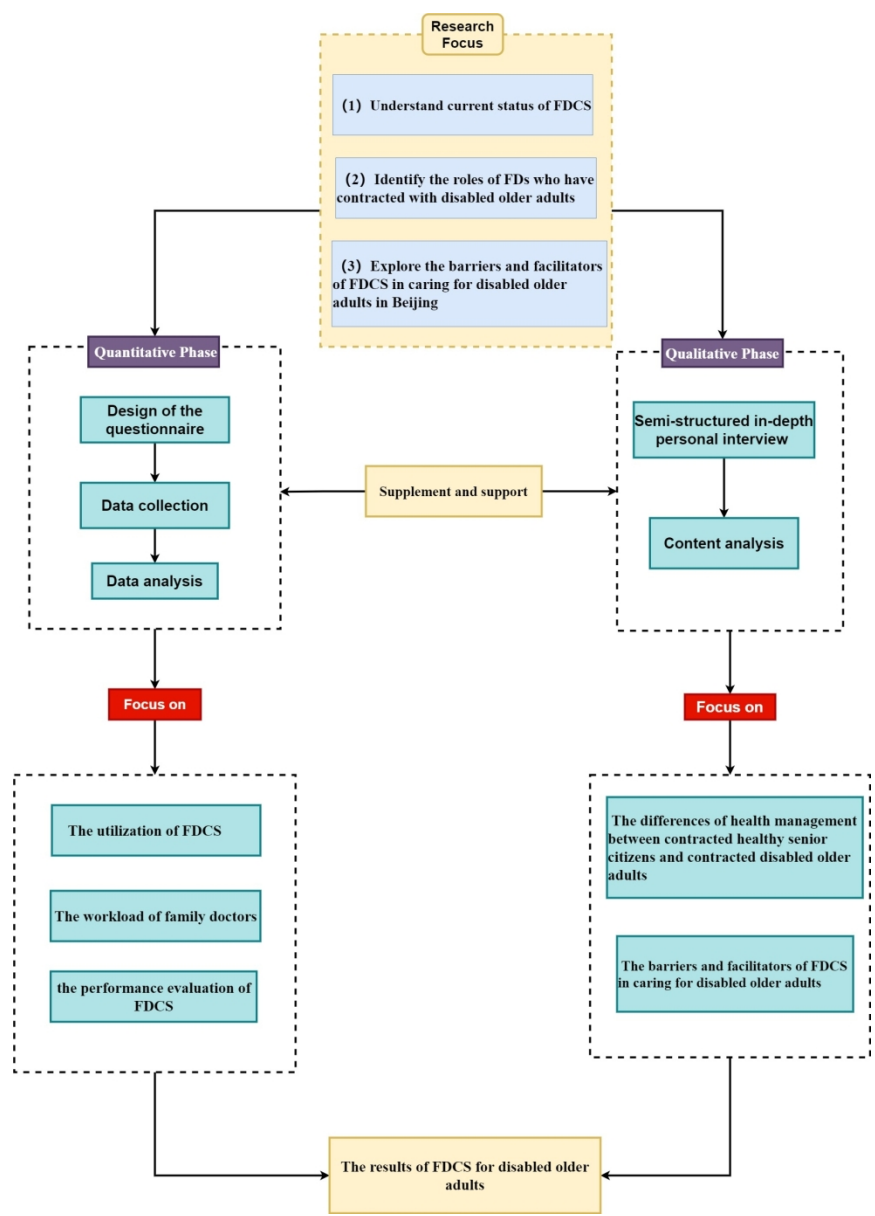

Process of the mixed methods research

602x841mm (72 x 72 DPI)



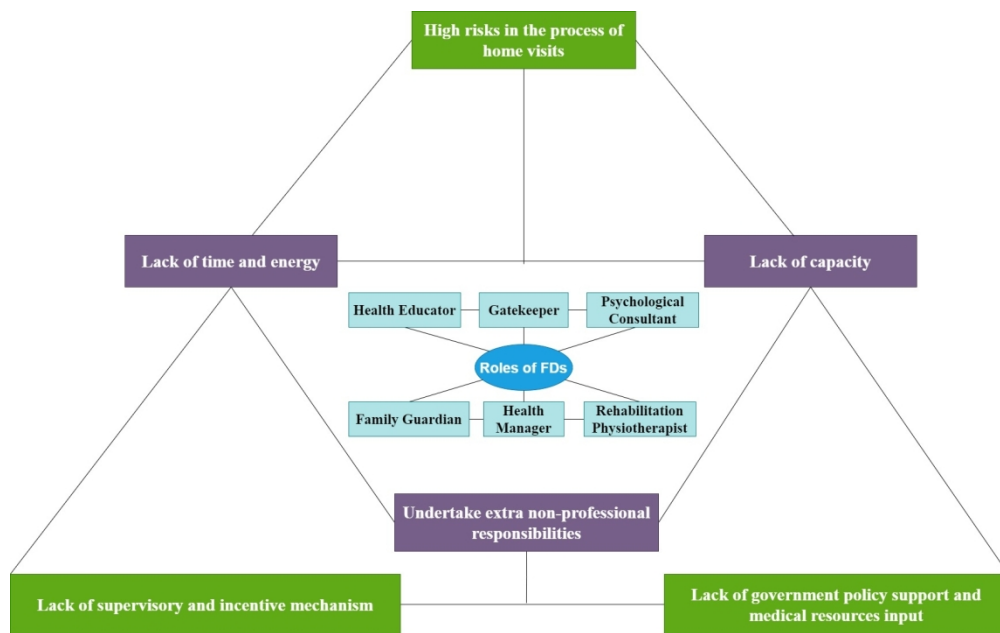

Schematic diagram of the relationships between the roles of FDs and the barriers

614x383mm (72 x 72 DPI)

**Supplemental Table 1 The analysis process of Family doctors from the interviews**

| Themes                                                                                     | Associated Sub-themes                        | Example of Verbatim Transcript                                                                                                                                                                                                                                                                                                                                                        |
|--------------------------------------------------------------------------------------------|----------------------------------------------|---------------------------------------------------------------------------------------------------------------------------------------------------------------------------------------------------------------------------------------------------------------------------------------------------------------------------------------------------------------------------------------|
| Differences                                                                                | Health demands (25/30)                       | “.....disabled older adults have greater health demands, particularly in the areas of Medicare and Medicaid.....” (Family doctor, N7)                                                                                                                                                                                                                                                 |
|                                                                                            | Service content (20/30)                      | “.....Disabled older adults usually have trouble moving, so we have to provide home-visiting service for them.....” (Family doctor, N5)                                                                                                                                                                                                                                               |
|                                                                                            | Level of humanistic care (17/30)             | “.....Most of disabled old adults are rely on their families, they have little opportunity to communicate with others and receive less social support.....Family doctors should have more communication with the disabled older adults via WeChat or telephone, understand their physical and psychological conditions, and give them more empathetic care.....” (Family doctor, N30) |
|                                                                                            | Personal energy input (15/30)                | “.....Compared with the contracted healthy senior citizen, we need invest more energy and time to provide care for the disabled older adults. For senior patients who are well, the diagnosis takes around 10 minutes, while the home visits we offer to those who are incapacitated take at least an hour.....” (Family doctor, N13)                                                 |
|                                                                                            | Medical resources input (8/30)               | “.....The disabled old adults occupy more human and medical resources than contracted healthy elderly, especially the facilities and tools of diagnosis and treatment for home visits service.....” (Family doctor, N21)                                                                                                                                                              |
|                                                                                            | Level of service difficulty and risks (7/30) | “.....Care services for disabled older adults are more difficult due to their complex physical condition. Besides, as risk of home visits service is high, some professional services cannot be offered at the disabled older adults' home.....” (Family doctor, N23)                                                                                                                 |
|                                                                                            | Facilitators                                 | Establishing doctor-patient trust relationship (24/30)                                                                                                                                                                                                                                                                                                                                |
| Improving the health knowledge of the disabled old adults and their families (20/30)       |                                              | “..... Family doctors will regularly hold regular lectures on health knowledge for the disabled older adults and their families, and we will teach some nursing skills for them to deal with emergencies.....” (Family doctor, N9)                                                                                                                                                    |
| Improve the frequency of communication between doctors and the disabled old adults (18/30) |                                              | “.....Except for telephone follow-up, I have added patients' WeChat through which I could ask their physical and mental conditions every day.....” (Family doctor, N25)                                                                                                                                                                                                               |
| Lightening the financial burden of the disabled old adults and                             |                                              | “.....The disabled older adults and their families bear a huge economic and emotional burden, FDCS can                                                                                                                                                                                                                                                                                |

|    |                                                               |                                                                                                                |
|----|---------------------------------------------------------------|----------------------------------------------------------------------------------------------------------------|
| 1  |                                                               |                                                                                                                |
| 2  |                                                               |                                                                                                                |
| 3  |                                                               |                                                                                                                |
| 4  | their families (16/30)                                        | greatly solve the problems of the disabled older adults and their families, facilitate their lives and relieve |
| 5  |                                                               | their economic pressure.....” (Family doctor, N16)                                                             |
| 6  |                                                               |                                                                                                                |
| 7  | Developing humanistic care services (13/30)                   | “.....The disabled older adults have no the ability to look after themselves and lack the initiative to manage |
| 8  |                                                               | their own health, so as Family doctors, we should pay more attention on them and provide more                  |
| 9  |                                                               | humanistic care services, such as psychological counseling.....” (Family doctor, N6)                           |
| 10 |                                                               |                                                                                                                |
| 11 | Improve the efficiency of medical resources (9/30)            | “.....FDCS has greatly eased the pressure of local hospitals. Through home visits services, most of the        |
| 12 |                                                               | medical needs of the disabled older adults can be met, and the waste of medical resources can be               |
| 13 |                                                               | avoided.....” (Family doctor, N24)                                                                             |
| 14 |                                                               |                                                                                                                |
| 15 | Short of hands (23/30)                                        | “.....The staff shortage of Family doctor team is a thorny problem. If the salary is not properly distributed, |
| 16 |                                                               | human resources will be insufficient.....” (Family doctor, N5)                                                 |
| 17 |                                                               |                                                                                                                |
| 18 | High risks of home visits service (17/30)                     | “.....There are many risks on home visits service. Whether we go to the homes of the disabled old adults or    |
| 19 |                                                               | conduct home visiting service in their home, we are faced with many threats.....” (Family doctor, N2)          |
| 20 |                                                               |                                                                                                                |
| 21 | Lack of continuity in FDCS (15/30)                            | “.....The FDCS just sustain one year, the contractual relationship between Family doctors and the disabled     |
| 22 |                                                               | older adults is not very close, some disabled older adults people who I am responsible for them this year,     |
| 23 |                                                               | but I may not manage their health next year. The continuity of FDCS cannot be effectively guaranteed.....”     |
| 24 |                                                               | (Family doctor, N17)                                                                                           |
| 25 |                                                               |                                                                                                                |
| 26 | Lack of government policy support (11/30)                     | “.....FDCS lack the support of government policy, and the medical resources in Beijing are unevenly            |
| 27 |                                                               | distributed.....our CHC lack basic inspection facilities, which brings a lot of inconvenience to conduct       |
| 28 |                                                               | Family doctor contract services.....” (Family doctor, N8)                                                      |
| 29 |                                                               |                                                                                                                |
| 30 | Poor compliance of the disabled old adults and their families | “..... Most of the disabled older adults and their family are very cooperative with our work, but some         |
| 31 | (8/30)                                                        | patients will put forward additional requirements beyond the scope of FDCS, which are hard to meet. So         |
| 32 |                                                               | there are some complaints from the disabled older adults and their families.....” (Family doctor, N11)         |
| 33 |                                                               |                                                                                                                |
| 34 | Lack of supervisory and incentive policies for Family doctors | “..... Our Family doctor team does not have a supervision and incentive policy.....My contribution is not      |
| 35 | (5/30)                                                        | directly proportional to my income, and most of the services for the disabled older adults are promoted by     |
| 36 |                                                               | my responsibility.....” (Family doctor, N3)                                                                    |
| 37 |                                                               |                                                                                                                |
| 38 | Insufficient publicity of FDCS (4/30)                         | “.....The propagation intensity of FDCS is a long way to go, many the disabled older adults and their          |
| 39 |                                                               | families misunderstand our work, which has brought a lot of troubles to Family doctors.....” (Family           |
| 40 |                                                               | doctor, N19)                                                                                                   |
| 41 |                                                               |                                                                                                                |
| 42 | Shift more care responsibility on Family doctors (3/30)       | “.....The family members of the disabled older adults believe that Family doctors should take responsible      |
| 43 |                                                               |                                                                                                                |
| 44 |                                                               |                                                                                                                |
| 45 |                                                               |                                                                                                                |
| 46 |                                                               |                                                                                                                |
| 47 |                                                               |                                                                                                                |
| 48 |                                                               |                                                                                                                |
| 49 |                                                               |                                                                                                                |
| 50 |                                                               |                                                                                                                |
| 51 |                                                               |                                                                                                                |
| 52 |                                                               |                                                                                                                |
| 53 |                                                               |                                                                                                                |
| 54 |                                                               |                                                                                                                |
| 55 |                                                               |                                                                                                                |
| 56 |                                                               |                                                                                                                |
| 57 |                                                               |                                                                                                                |
| 58 |                                                               |                                                                                                                |
| 59 |                                                               |                                                                                                                |
| 60 |                                                               |                                                                                                                |

1  
2  
3  
4  
5  
6  
7  
8  
9  
10  
11  
12  
13  
14  
15  
16  
17  
18  
19  
20  
21  
22  
23  
24  
25  
26  
27  
28  
29  
30  
31  
32  
33  
34  
35  
36  
37  
38  
39  
40  
41  
42  
43  
44  
45  
46  
47  
48  
49  
50  
51  
52  
53  
54  
55  
56  
57  
58  
59  
60

to the health of the senior. With my help, they pay less attention to the elderly, trying to evade their care responsibilities. Sometimes I feel like I'm being filial to the disabled older adults....." (Family doctor, N10)

---

For peer review only

## STROBE Statement—checklist of items that should be included in reports of observational studies

|                              | Item No | Recommendation                                                                                                                                                                                                                                                                                                                                                                                                                                                         | Page No |
|------------------------------|---------|------------------------------------------------------------------------------------------------------------------------------------------------------------------------------------------------------------------------------------------------------------------------------------------------------------------------------------------------------------------------------------------------------------------------------------------------------------------------|---------|
| <b>Title and abstract</b>    | 1       | (a) Indicate the study's design with a commonly used term in the title or the abstract                                                                                                                                                                                                                                                                                                                                                                                 | 1       |
|                              |         | (b) Provide in the abstract an informative and balanced summary of what was done and what was found                                                                                                                                                                                                                                                                                                                                                                    | 1,2     |
| <b>Introduction</b>          |         |                                                                                                                                                                                                                                                                                                                                                                                                                                                                        |         |
| Background/rationale         | 2       | Explain the scientific background and rationale for the investigation being reported                                                                                                                                                                                                                                                                                                                                                                                   | 3       |
| Objectives                   | 3       | State specific objectives, including any prespecified hypotheses                                                                                                                                                                                                                                                                                                                                                                                                       | 4       |
| <b>Methods</b>               |         |                                                                                                                                                                                                                                                                                                                                                                                                                                                                        |         |
| Study design                 | 4       | Present key elements of study design early in the paper                                                                                                                                                                                                                                                                                                                                                                                                                | 4       |
| Setting                      | 5       | Describe the setting, locations, and relevant dates, including periods of recruitment, exposure, follow-up, and data collection                                                                                                                                                                                                                                                                                                                                        | 5       |
| Participants                 | 6       | (a) <i>Cohort study</i> —Give the eligibility criteria, and the sources and methods of selection of participants. Describe methods of follow-up<br><i>Case-control study</i> —Give the eligibility criteria, and the sources and methods of case ascertainment and control selection. Give the rationale for the choice of cases and controls<br><i>Cross-sectional study</i> —Give the eligibility criteria, and the sources and methods of selection of participants | 5,7     |
|                              |         | (b) <i>Cohort study</i> —For matched studies, give matching criteria and number of exposed and unexposed<br><i>Case-control study</i> —For matched studies, give matching criteria and the number of controls per case                                                                                                                                                                                                                                                 | 6,7     |
| Variables                    | 7       | Clearly define all outcomes, exposures, predictors, potential confounders, and effect modifiers. Give diagnostic criteria, if applicable                                                                                                                                                                                                                                                                                                                               | 6,7     |
| Data sources/<br>measurement | 8*      | For each variable of interest, give sources of data and details of methods of assessment (measurement). Describe comparability of assessment methods if there is more than one group                                                                                                                                                                                                                                                                                   | 6,7     |
| Bias                         | 9       | Describe any efforts to address potential sources of bias                                                                                                                                                                                                                                                                                                                                                                                                              | 6,7     |
| Study size                   | 10      | Explain how the study size was arrived at                                                                                                                                                                                                                                                                                                                                                                                                                              | 6,8     |
| Quantitative variables       | 11      | Explain how quantitative variables were handled in the analyses. If applicable, describe which groupings were chosen and why                                                                                                                                                                                                                                                                                                                                           | 6       |
| Statistical methods          | 12      | (a) Describe all statistical methods, including those used to control for confounding                                                                                                                                                                                                                                                                                                                                                                                  | N/A     |
|                              |         | (b) Describe any methods used to examine subgroups and interactions                                                                                                                                                                                                                                                                                                                                                                                                    | N/A     |
|                              |         | (c) Explain how missing data were addressed                                                                                                                                                                                                                                                                                                                                                                                                                            | N/A     |
|                              |         | (d) <i>Cohort study</i> —If applicable, explain how loss to follow-up was addressed<br><i>Case-control study</i> —If applicable, explain how matching of cases and controls was addressed<br><i>Cross-sectional study</i> —If applicable, describe analytical methods taking account of sampling strategy                                                                                                                                                              | 7,8     |
|                              |         | (e) Describe any sensitivity analyses                                                                                                                                                                                                                                                                                                                                                                                                                                  | 7,8     |

Continued on next page

1  
2  
3  
4  
5  
6  
7  
8  
9  
10  
11  
12  
13  
14  
15  
16  
17  
18  
19  
20  
21  
22  
23  
24  
25  
26  
27  
28  
29  
30  
31  
32  
33  
34  
35  
36  
37  
38  
39  
40  
41  
42  
43  
44  
45  
46  
47  
48  
49  
50  
51  
52  
53  
54  
55  
56  
57  
58  
59  
60**Results**

|                  |         |                                                                                                                                                                                                              |      |
|------------------|---------|--------------------------------------------------------------------------------------------------------------------------------------------------------------------------------------------------------------|------|
| Participants     | 13<br>* | (a) Report numbers of individuals at each stage of study—eg numbers potentially eligible, examined for eligibility, confirmed eligible, included in the study, completing follow-up, and analysed            | 6,7  |
|                  |         | (b) Give reasons for non-participation at each stage                                                                                                                                                         | 6,7  |
|                  |         | (c) Consider use of a flow diagram                                                                                                                                                                           | 4    |
| Descriptive data | 14<br>* | (a) Give characteristics of study participants (eg demographic, clinical, social) and information on exposures and potential confounders                                                                     | 9,15 |
|                  |         | (b) Indicate number of participants with missing data for each variable of interest                                                                                                                          | 6,7  |
|                  |         | (c) <i>Cohort study</i> —Summarise follow-up time (eg, average and total amount)                                                                                                                             | N/A  |
| Outcome data     | 15<br>* | <i>Cohort study</i> —Report numbers of outcome events or summary measures over time                                                                                                                          | N/A  |
|                  |         | <i>Case-control study</i> —Report numbers in each exposure category, or summary measures of exposure                                                                                                         | N/A  |
|                  |         | <i>Cross-sectional study</i> —Report numbers of outcome events or summary measures                                                                                                                           | 6,7  |
| Main results     | 16      | (a) Give unadjusted estimates and, if applicable, confounder-adjusted estimates and their precision (eg, 95% confidence interval). Make clear which confounders were adjusted for and why they were included | 14   |
|                  |         | (b) Report category boundaries when continuous variables were categorized                                                                                                                                    | N/A  |
|                  |         | (c) If relevant, consider translating estimates of relative risk into absolute risk for a meaningful time period                                                                                             | N/A  |
| Other analyses   | 17      | Report other analyses done—eg analyses of subgroups and interactions, and sensitivity analyses                                                                                                               | 16   |

**Discussion**

|                  |    |                                                                                                                                                                            |           |
|------------------|----|----------------------------------------------------------------------------------------------------------------------------------------------------------------------------|-----------|
| Key results      | 18 | Summarise key results with reference to study objectives                                                                                                                   | 21,2<br>2 |
| Limitations      | 19 | Discuss limitations of the study, taking into account sources of potential bias or imprecision. Discuss both direction and magnitude of any potential bias                 | 25        |
| Interpretation   | 20 | Give a cautious overall interpretation of results considering objectives, limitations, multiplicity of analyses, results from similar studies, and other relevant evidence | 25        |
| Generalisability | 21 | Discuss the generalisability (external validity) of the study results                                                                                                      | 23,2<br>4 |

**Other information**

|         |    |                                                                                                                                                               |    |
|---------|----|---------------------------------------------------------------------------------------------------------------------------------------------------------------|----|
| Funding | 22 | Give the source of funding and the role of the funders for the present study and, if applicable, for the original study on which the present article is based | 26 |
|---------|----|---------------------------------------------------------------------------------------------------------------------------------------------------------------|----|

\*Give information separately for cases and controls in case-control studies and, if applicable, for exposed and unexposed groups in cohort and cross-sectional studies.

**Note:** An Explanation and Elaboration article discusses each checklist item and gives methodological background and published examples of transparent reporting. The STROBE checklist is best used in conjunction with this article (freely available on the Web sites of PLoS Medicine at <http://www.plosmedicine.org/>, Annals of Internal Medicine at <http://www.annals.org/>, and Epidemiology at <http://www.epidem.com/>). Information on the STROBE Initiative is available at [www.strobe-statement.org](http://www.strobe-statement.org).
